# Supplementary material for: Halogenation of aromatic compounds with N-halosuccinimides (NXS) catalysed by d-camphorsulfonic acid-BiCl3
Source: Royal Society of Chemistry journal article supplement (doi:10.1039/d4ob00837e), 2024-01-01
Supplement: d4ob00837e1.pdf [file d4ob00837e1.pdf]

**Halogenation of aromatic compounds with *N*-halosuccinimides (NXS)  
catalysed by D-camphorsulfonic acid–BiCl<sub>3</sub>**

Kiyoshi Tanemura\*

Chemical Laboratory, School of Life Dentistry at Niigata, Nippon Dental University, Hamaura-cho,  
Niigata 951-8580, Japan

E-mail: tanemura@ngt.ndu.ac.jp

**Supplementary Information**

## Table of Contents

|                                                                                                         |       |      |
|---------------------------------------------------------------------------------------------------------|-------|------|
| 1. General information                                                                                  | ----- | S-3  |
| 2. Experimental procedures                                                                              | ----- | S-4  |
| 3. Tables                                                                                               | ----- | S-7  |
| 4. Analytical data of compounds 2j, 2s, 2t, 3b, 3c, 3j, 3s, 3t, 4b, 4c, 5e and 5r                       | ----- | S-9  |
| 5. <sup>1</sup> H- and <sup>13</sup> C-NMR spectra of 2j, 2s, 2t, 3b, 3c, 3j, 3s, 3t, 4b, 4c, 5e and 5r | ----- | S-14 |
| 6. References                                                                                           | ----- | S-26 |

## 1. General information

Melting points were determined on a Yamato melting point apparatus MP-21 and are uncorrected. IR spectra were recorded using a JEOL FT/IR-4600ST spectrophotometer. NMR spectra were measured on a Varian NMR system 700 spectrometer (700 MHz) using tetramethylsilane as an internal standard. Column chromatography was performed on Merck Silica gel 60. Unless otherwise stated, anhydrous sodium sulfate was employed as the drying agent. Aromatic compounds and  $\text{PdCl}_2(\text{PPh}_3)_2$  were purchased from TCI.  $\text{PdCl}_2(\text{dppf})$  was purchased from Merck. Potassium carbonate (Fine powder for organic synthesis) and dry solvents (Super dehydrated for organic synthesis) were purchased from Fujifilm Wako Chemicals. IR and  $^1\text{H-NMR}$  spectra of compounds **2a-i**, **2k-n**, **2v**, **2h'**, **2h''**, **2a'**, **2a''**, **3a**, **3d-g**, **3i**, **3k-m**, **3p**, **3a'**, **3e'**, **3m'**, **4d**, **4e**, **4v**, **5g**, **5l**, **5q**, **6l** and **7g** were completely in accordance with those of the commercially available samples purchased from TCI. IR and  $^1\text{H-NMR}$  spectra of compounds **2u**, **3n** and **3u** were completely in accordance with those of the commercially available sample purchased from Aldrich. IR and  $^1\text{H-NMR}$  spectra of compound **3v** were completely in accordance with those of the commercially available sample purchased from Fujifilm Wako Chemicals. IR and  $^1\text{H-NMR}$  spectra of compounds **6g** and **6n** were completely in accordance with those of the commercially available sample purchased from Nacalai tesque.  $\text{CH}_2\text{BrCN}$  was identified by the comparison of  $^1\text{H-NMR}$  spectra with that of the commercially available sample purchased from TCI. Compounds **2j**, **2s**, **2t**, **3b**, **3c**, **3j**, **3s**, **3t**, **4b**, **4c**, **5e** and **5r** were identified by the comparison of spectroscopic characteristics with the authentic samples reported in the literature.<sup>1-9</sup>

## 2. Experimental procedures

### General procedure for the bromination of aromatic compounds in MeCN

CSA (23 mg, 1 mol%) and BiCl<sub>3</sub> (32 mg, 1 mol%) were added to the solution of **1d** (1.20 g, 10 mmol) in dry MeCN (10 mL) at room temperature under an atmosphere of air. NBS (1.87 g, 10.5 mmol) was added to the solution. After stirring the mixture at room temperature for 1 h, saturated NaHCO<sub>3</sub> (15 mL) was added and the mixture was extracted with Et<sub>2</sub>O (50 mL) twice. The combined extracts were washed with water (25 mL × 2), dried and evaporated. The residue was purified by column chromatography on silica gel using heptane as eluent to give **2d** (1.93 g, 97%).

### General procedure for the chlorination of aromatic compounds in MeCN

CSA (46 mg, 2 mol%) and BiCl<sub>3</sub> (64 mg, 2 mol%) were added to the solution of **1d** (1.20 g, 10 mmol) in dry MeCN (10 mL) at room temperature under an atmosphere of air. NCS (1.40 g, 10.5 mmol) was added to the solution. After stirring the mixture at 80 °C for 3 h, saturated NaHCO<sub>3</sub> (15 mL) was added and the mixture was extracted with Et<sub>2</sub>O (50 mL) twice. The combined extracts were washed with water (25 mL × 2), dried and evaporated. The residue was purified by column chromatography on silica gel using heptane as eluent to give **3d** (1.48 g, 96%).

### General procedure for the iodination of aromatic compounds in MeCN

CSA (116 mg, 5 mol%) and BiCl<sub>3</sub> (158 mg, 5 mol%) were added to the solution of **1d** (1.20 g, 10 mmol) in dry MeCN (10 mL) at room temperature under an atmosphere of air. NIS (2.36 g, 10.5 mmol) was added to the solution. After stirring the mixture at 80 °C for 4 h, saturated NaHCO<sub>3</sub> (15

mL) was added and the mixture was extracted with Et<sub>2</sub>O (50 mL) twice. The combined extracts were washed with water (25 mL × 2), dried and evaporated. The residue was purified by column chromatography on silica gel using heptane as eluent to give **4d** (2.36 g, 96%).

#### **One-pot bromination followed by Suzuki-Miyaura cross-coupling**

After the completion of the bromination of **1g**, PhB(OH)<sub>2</sub> (1.464 g, 12 mmol), K<sub>2</sub>CO<sub>3</sub> (2.76 g, 20 mmol), H<sub>2</sub>O (10 mL) and PdCl<sub>2</sub>(PPh<sub>3</sub>)<sub>2</sub> (210 mg, 3 mol%) were added in succession at room temperature. The mixture was degassed with nitrogen 4 times. After stirring the mixture at 80 °C for 4 h, water (30 mL) was added and the mixture was extracted with toluene (80 mL) twice. The combined extracts were washed with water (50 mL × 2), dried and evaporated. The residue was purified by column chromatography on silica gel using heptane as eluent to give **5g** (1.98 g, 97%).

#### **One-pot bromination followed by Sonogashira coupling**

After the completion of the bromination of **1g**, phenylacetylene (1.12 g, 11 mmol), dry MeCN (40 mL), Et<sub>3</sub>N (2.02 g, 20 mmol), CuI (96 mg, 0.5 mmol, 5 mol%) and PdCl<sub>2</sub>(PPh<sub>3</sub>)<sub>2</sub> (210 mg, 0.3 mmol, 3 mol%) were added in succession at room temperature. The mixture was degassed with nitrogen 4 times. After stirring the mixture at 90 °C for 12 h, the reaction mixture was evaporated under reduced pressure. Water (50 mL) was added and the mixture was extracted with toluene (80 mL) twice. The combined extracts were washed with water (50 mL × 3), dried and evaporated. The residue was purified by column chromatography on silica gel using heptane as eluent to give **6g** (1.64 g, 72%).

#### **One-pot bromination followed by Miyaura borylation**

After the completion of the bromination of **1g**, dry DMSO (60 mL), (Bpin)<sub>2</sub> (2.80 g, 11 mmol), KOAc (2.94 g, 30 mmol) and PdCl<sub>2</sub>(dppf) [dppf = 1,1'-bis(diphenylphosphino)ferrocene] (220 mg,

0.3 mmol, 3 mol%) were added in succession at room temperature. The mixture was degassed with nitrogen 4 times. After stirring the mixture at 80 °C for 24 h, the reaction mixture was extracted with toluene (80 mL) twice. The combined extracts were washed with water (50 mL × 3), dried and evaporated. The residue was purified by column chromatography on silica gel using heptane as eluent. Bromide **2g** was obtained in 82% (1.70 g).

### 3. Tables

**Table S1** Bromination of toluene (**1a**) using catalytic amounts of Lewis acids and additives<sup>a</sup>

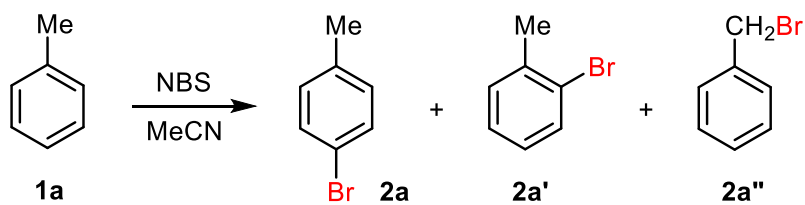

| Entry | Lewis acid                                     | Additive                          | Time | <b>2a</b> (%) <sup>b</sup> | <b>2a'</b> (%) <sup>b</sup> | <b>2a''</b> (%) <sup>b</sup> |
|-------|------------------------------------------------|-----------------------------------|------|----------------------------|-----------------------------|------------------------------|
| 1     | NbCl <sub>5</sub>                              | 1,2,2,6,6-penta-methylpiperidine  | 6 h  | 6                          | 4                           | 17                           |
| 2     | NbCl <sub>5</sub>                              | Ph <sub>3</sub> P                 | 6 h  | 17                         | 9                           | 53                           |
| 3     | B(C <sub>6</sub> F <sub>5</sub> ) <sub>3</sub> | Ph <sub>3</sub> P                 | 6 h  | 17                         | 10                          | 30                           |
| 4     | NbCl <sub>5</sub>                              | Bu <sub>4</sub> PBPh <sub>4</sub> | 6 h  | 5                          | 5                           | trace                        |

<sup>a</sup> Conditions: toluene **1a** (10 mmol), Lewis acid (10 mol%), additive (10 mol%), NBS (10.5 mmol), dry MeCN (10 mL), room temp. <sup>b</sup> Determined by <sup>1</sup>H-NMR spectroscopy using TCE.

**Table S2** Iodination of aromatic rings with NIS in MeCN<sup>a</sup>

| Entry           | ArH                                                                                           | CSA-BiCl <sub>3</sub><br>(mol%) | Temp<br>(°C) | Time<br>(h) | ArI / Yield (%) <sup>b</sup>                                                                    |
|-----------------|-----------------------------------------------------------------------------------------------|---------------------------------|--------------|-------------|-------------------------------------------------------------------------------------------------|
| 1               | 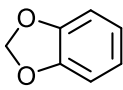 <b>1b</b>   | 5                               | 80           | 24          |  <b>4b</b> 95 |
| 2               |  <b>1c</b>   | 5                               | 80           | 12          |  <b>4c</b> 94 |
| 3               |  <b>1d</b>   | 5                               | 80           | 4           |  <b>4d</b> 96 |
| 4               |  <b>1e</b>   | 2                               | 80           | 7           |  <b>4e</b> 97 |
| 5               |  <b>1a</b>  | 10                              | 80           | 26          | NR                                                                                              |
| 6 <sup>c</sup>  |  <b>1a</b>  | 10                              | 80           | 16          | NR                                                                                              |
| 7               |  <b>1i</b> | 10                              | 80           | 16          | NR                                                                                              |
| 8 <sup>c</sup>  |  <b>1i</b> | 10                              | 80           | 16          | NR                                                                                              |
| 9 <sup>c</sup>  |  <b>1k</b> | 10                              | 80           | 16          | NR                                                                                              |
| 10 <sup>c</sup> |  <b>1l</b> | 10                              | 80           | 16          | NR                                                                                              |
| 11 <sup>c</sup> |  <b>1m</b> | 10                              | 80           | 16          | NR                                                                                              |
| 12 <sup>c</sup> |  <b>1n</b> | 10                              | 100          | 16          | NR                                                                                              |
| 13 <sup>c</sup> |  <b>1o</b> | 10                              | 120          | 24          | NR                                                                                              |

<sup>a</sup> Conditions: ArH **1** (10 mmol), NIS (10.5 mmol), dry MeCN (10 mL),<sup>b</sup> Isolated yield. <sup>c</sup> Without MeCN.



## 5. Analytical data of compounds **2j**, **2s**, **2t**, **3b**, **3c**, **3j**, **3s**, **3t**, **4b**, **4c**, **5e** and **5r**

Methyl 5-bromo-2-methoxybenzoate (**2j**)<sup>1</sup>

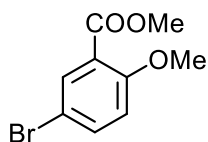

Colourless oil; IR (neat) 3106, 3078, 3005, 2950, 2905, 2842, 1732, 1717, 1594, 1572, 1488, 1463, 1435, 1395, 1300, 1275, 1251, 1182, 1151, 1099, 1083, 1023, 968, 899, 850, 813, 783, 707, 677, 625, 582 and 529 cm<sup>-1</sup>; <sup>1</sup>H-NMR (CDCl<sub>3</sub>) δ = 3.89 (6H, s), 6.87 (1H, d, *J* = 8.9 Hz), 7.55 (1H, dd, *J* = 8.9 and 2.6 Hz) and 7.91 (1H, d, *J* = 2.6 Hz); <sup>13</sup>C-NMR (CDCl<sub>3</sub>) δ = 52.3, 56.3, 112.2, 113.9, 134.2, 136.1, 158.3 and 165.3.

5-Chlorobenzo[d][1,3]dioxole (**3b**)<sup>2</sup>

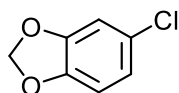

Colourless oil; IR (neat) 3110, 3080, 3011, 2979, 2898, 2779, 1625, 1606, 1504, 1476, 1425, 1341, 1236, 1156, 1124, 1105, 1039, 936, 889, 849, 801, 741, 724, 690, 662, 582, 443 and 419 cm<sup>-1</sup>; <sup>1</sup>H-NMR (CDCl<sub>3</sub>) δ = 5.97 (2H, s), 6.72 (1H, d, *J* = 8.3 Hz), 6.79 (1H, dd, *J* = 8.3 and 2.0 Hz) and 6.82 (1H, d, *J* = 2.0 Hz); <sup>13</sup>C-NMR (CDCl<sub>3</sub>) δ = 101.7, 108.9, 109.6, 121.3, 126.3, 146.5 and 148.3.

5-Chloro-2,3-dihydrobenzofuran (**3c**)<sup>3</sup>

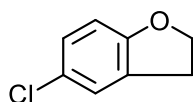

Colourless plates, mp 36-37 °C; IR (KBr) 3098, 3062, 3038, 2979, 2948, 2904, 2861, 1634, 1605, 1591, 1482, 1469, 1441, 1424, 1362, 1302, 1279, 1233, 1161, 1108, 1066, 983, 943, 882, 809, 752, 709, 679, 581, 545 and 420 cm<sup>-1</sup>; <sup>1</sup>H-NMR (CDCl<sub>3</sub>) δ = 3.19 (2H, t, *J* = 8.7 Hz), 4.58 (2H, t, *J* = 8.7

Hz), 6.69 (1H, d,  $J = 8.4$  Hz), 7.05 (1H, dd,  $J = 8.4$  and  $2.2$  Hz) and 7.14 (1H, d,  $J = 2.2$  Hz) ;  
 $^{13}\text{C-NMR}$  ( $\text{CDCl}_3$ )  $\delta = 29.5, 71.4, 81.6, 111.7, 130.1, 133.7, 136.7$  and  $160.0$ .

Methyl 5-chloro-2-methoxybenzoate (**3j**)<sup>4</sup>

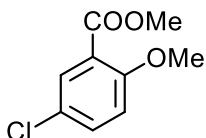

Colourless oil; IR (neat) 3078, 3004, 2950, 2904, 2841, 1733, 1595, 1578, 1489, 1463, 1436, 1396, 1301, 1275, 1250, 1182, 1151, 1131, 1098, 1084, 1050, 1023, 967, 899, 850, 813, 783, 758, 706, 676, 625 and  $529\text{ cm}^{-1}$ ;  $^1\text{H-NMR}$  ( $\text{CDCl}_3$ )  $\delta = 3.89$  (6H, s), 6.92 (1H, d,  $J = 8.9$  Hz), 7.42 (1H, dd,  $J = 8.9$  and  $2.7$  Hz) and 7.77 (1H, d,  $J = 2.7$  Hz);  $^{13}\text{C-NMR}$  ( $\text{CDCl}_3$ )  $\delta = 52.3, 56.3, 113.4, 121.2, 125.2, 131.4, 133.1, 157.8$  and  $165.4$ .

5-Iodobenzo[d][1,3]dioxole (**4b**)<sup>5</sup>

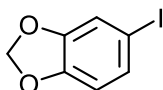

Colourless oil; IR (neat) 3090, 3071, 3006, 2971, 2982, 2776, 1617, 1596, 1498, 1472, 1413, 1398, 1334, 1230, 1155, 1105, 1040, 935, 864, 799, 740, 718, 662, 568, 429 and  $412\text{ cm}^{-1}$ ;  $^1\text{H-NMR}$  ( $\text{CDCl}_3$ )  $\delta = 5.95$  (2H, s), 6.59 (1H, d,  $J = 8.1$  Hz), 7.12 (1H, d,  $J = 1.6$  Hz) and 7.14 (1H, dd,  $J = 8.1$  and  $1.6$  Hz);  $^{13}\text{C-NMR}$  ( $\text{CDCl}_3$ )  $\delta = 82.2, 101.4, 110.5, 117.7, 130.6, 147.8$  and  $148.7$ .

5-Iodo-2,3-dihydrobenzofuran (**4c**)<sup>6</sup>

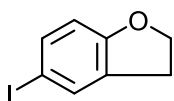

Colourless needles, mp  $64\text{-}65\text{ }^\circ\text{C}$ ; IR (KBr) 3088, 2989, 2960, 2898, 2846, 1597, 1574, 1473, 1433, 1407, 1363, 1297, 1284, 1231, 1187, 1158, 1132, 1107, 1084, 1047, 978, 942, 891, 816, 673, 632 and

541  $\text{cm}^{-1}$ ;  $^1\text{H-NMR}$  ( $\text{CDCl}_3$ )  $\delta = 3.20$  (2H, t,  $J = 8.8$  Hz), 4.56 (2H, t,  $J = 8.8$  Hz), 6.57 (1H, d,  $J = 8.4$  Hz), 7.38 (1H, d,  $J = 8.4$  and 1.0 Hz) and 7.47 (1H, s);  $^{13}\text{C-NMR}$  ( $\text{CDCl}_3$ )  $\delta = 29.5, 71.4, 81.6, 111.7, 130.1, 133.7, 136.7$  and 160.0.

4-Methoxy-4'-methyl-1,1'-biphenyl (**5e**)<sup>7</sup>

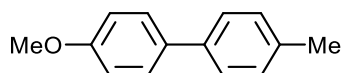

Colourless plates, mp 106-107  $^{\circ}\text{C}$ ; IR (KBr) 3070, 3022, 2957, 2940, 2920, 2840, 1654, 1607, 1583, 1531, 1501, 1455, 1400, 1317, 1289, 1270, 1253, 1220, 1183, 1138, 1116, 1038, 1013, 842, 808, 784, 723 and 499  $\text{cm}^{-1}$ ;  $^1\text{H-NMR}$  ( $\text{CDCl}_3$ )  $\delta = 2.38$  (3H, s), 3.84 (3H, s), 6.97 (2H, d,  $J = 7.8$  Hz), 7.22 (2H, d,  $J = 8.8$  Hz), 7.44 (2H, d,  $J = 7.8$  Hz) and 7.51 (2H, d,  $J = 8.8$  Hz);  $^{13}\text{C-NMR}$  ( $\text{CDCl}_3$ )  $\delta = 21.0, 55.3, 114.1, 126.6, 127.9, 129.4, 133.7, 136.3, 138.0$  and 158.9.

1-(4-(Naphthalen-1-yl)phenyl)ethan-1-one (**5r**)<sup>8</sup>

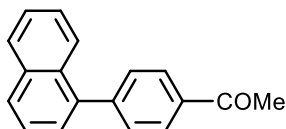

Colourless needles, mp 97-98  $^{\circ}\text{C}$ ; IR (KBr) 3348, 3082, 3055, 3034, 3005, 1682, 1605, 1589, 1561, 1418, 1402, 1356, 1309, 1285, 1268, 1256, 1186, 1111, 1016, 959, 849, 806, 791, 780, 662, 605, 569 and 436  $\text{cm}^{-1}$ ;  $^1\text{H-NMR}$  ( $\text{CDCl}_3$ )  $\delta = 2.69$  (3H, s), 7.42-7.46 (2H, m), 7.50-7.55 (2H, m), 7.61 (2H, d,  $J = 8.3$  Hz), 7.84 (1H, d,  $J = 8.5$  Hz), 7.90 (1H, d,  $J = 8.3$  Hz), 7.92 (1H, d,  $J = 8.1$  Hz) and 8.09 (2H, d,  $J = 8.3$  Hz);  $^{13}\text{C-NMR}$  ( $\text{CDCl}_3$ )  $\delta = 26.7, 125.3, 125.6, 126.0, 126.4, 126.9, 128.4, 128.4, 128.4, 130.3, 131.2, 133.8, 136.0, 139.0$  and 197.9.

Fenofibrate-Br (**2s**)<sup>9</sup>

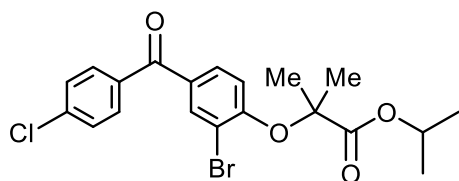

Colourless needles, mp 62-63 °C; IR (KBr) 3094, 3069, 3054, 2985, 2936, 1719, 1658, 1587, 1557, 1481, 1462, 1398, 1382, 1375, 1297, 1267, 1246, 1178, 1149, 1108, 1090, 1041, 1016, 970, 947, 934, 912, 847, 794, 761, 745, 700, 673, 659, 581, 485 and 423 cm<sup>-1</sup>; <sup>1</sup>H-NMR (CDCl<sub>3</sub>) δ = 1.22 (6H, d, *J* = 6.3 Hz), 1.70 (6H, s), 5.09 (1H, qq, *J* = 6.3 and 6.3 Hz), 6.82 (1H, d, *J* = 8.6 Hz), 7.47 (2H, d, *J* = 8.5 Hz), 7.63 (1H, dd, *J* = 8.6 and 2.2 Hz), 7.70 (2H, d, *J* = 8.5 Hz) and 8.03 (1H, d, *J* = 2.2 Hz); <sup>13</sup>C-NMR (CDCl<sub>3</sub>) δ = 21.5, 25.3, 69.5, 81.1, 114.9, 116.5, 128.7, 130.2, 131.2, 131.5, 135.6, 135.8, 138.8, 156.4, 172.7 and 193.1.

Clofibrate-Br (**2t**)<sup>9</sup>

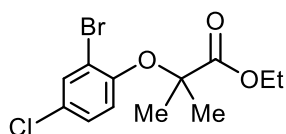

Colourless oil; IR (Neat) 3094, 3073, 2987, 2938, 2904, 2872, 1736, 1581, 1563, 1473, 1383, 1365, 1286, 1242, 1178, 1139, 1097, 1045, 1023, 968, 911, 867, 808, 767, 733, 720, 688, 653, 554 and 439 cm<sup>-1</sup>; <sup>1</sup>H-NMR (CDCl<sub>3</sub>) δ = 1.27 (3H, t, *J* = 7.1 Hz), 1.61 (6H, s), 4.25 (2H, q, *J* = 7.1 Hz), 6.82 (1H, d, *J* = 8.8 Hz), 7.14 (1H, dd, *J* = 8.8 and 2.5 Hz) and 7.54 (1H, d, *J* = 2.5 Hz); <sup>13</sup>C-NMR (CDCl<sub>3</sub>) δ = 14.1, 25.1, 61.7, 81.2, 116.8, 120.1, 127.9, 133.0, 151.5 and 173.7.

Fenofibrate-Cl (**3s**)<sup>9</sup>

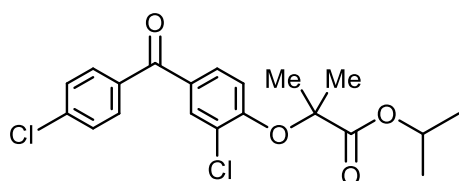

Colourless prisms, mp 85-86 °C; IR (KBr) 3100, 3074, 3058, 2985, 2936, 2876, 1717, 1653, 1588,

1562, 1485, 1461, 1399, 1382, 1297, 1268, 1241, 1199, 1179, 1156, 1107, 1089, 1053, 1014, 969, 935, 914, 850, 836, 821, 797, 764, 748, 704, 687, 656, 581, 545, 490, 480 and 427  $\text{cm}^{-1}$ ;  $^1\text{H-NMR}$  ( $\text{CDCl}_3$ )  $\delta$  = 1.22 (6H, d,  $J$  = 6.3 Hz), 1.69 (6H, s), 5.10 (1H, qq,  $J$  = 6.3 and 6.3Hz), 6.85 (1H, d,  $J$  = 8.6 Hz), 7.47 (2H, d,  $J$  = 8.5 Hz), 7.59 (1H, dd,  $J$  = 8.6 and 2.2 Hz), 7.70 (2H, d,  $J$  = 8.5 Hz) and 7.86 (1H, d,  $J$  = 2.2 Hz);  $^{13}\text{C-NMR}$  ( $\text{CDCl}_3$ )  $\delta$  = 21.5, 25.2, 69.5, 81.0, 116.9, 125.6, 128.7, 129.4, 131.2, 132.5, 135.8, 138.8, 155.5, 172.7 and 193.2.

Clofibrate-Cl (**3t**)<sup>9</sup>

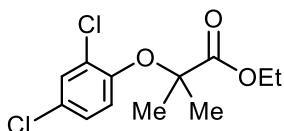

Colourless oil; IR (Neat) 3076, 2987, 2939, 2905, 2872, 1737, 1584, 1476, 1387, 1366, 1288, 1244, 1178, 1138, 1103, 1059, 1023, 968, 910, 866, 808, 768, 741, 698, 657, 559 and 442  $\text{cm}^{-1}$ ;  $^1\text{H-NMR}$  ( $\text{CDCl}_3$ )  $\delta$  = 1.27 (3H, t,  $J$  = 7.1 Hz), 1.60 (6H, s), 4.25 (2H, q,  $J$  = 7.1 Hz), 6.85 (1H, d,  $J$  = 8.8 Hz), 7.10 (1H, dd,  $J$  = 8.8 and 2.5 Hz) and 7.37 (1H, d,  $J$  = 2.5 Hz);  $^{13}\text{C-NMR}$  ( $\text{CDCl}_3$ )  $\delta$  = 14.1, 25.0, 61.6, 81.2, 120.7, 127.2, 127.6, 127.7, 130.1, 150.4 and 173.7.

## 6. <sup>1</sup>H- and <sup>13</sup>C-NMR spectra of 2j, 2s, 2t, 3b, 3c, 3j, 3s, 3t, 4b, 4c, 5e and 5r

A\_1H\_231212a 10 1 \\192.168.1.11\mrdata\CIA\data\Tanemura\mr\data\CIA\mr

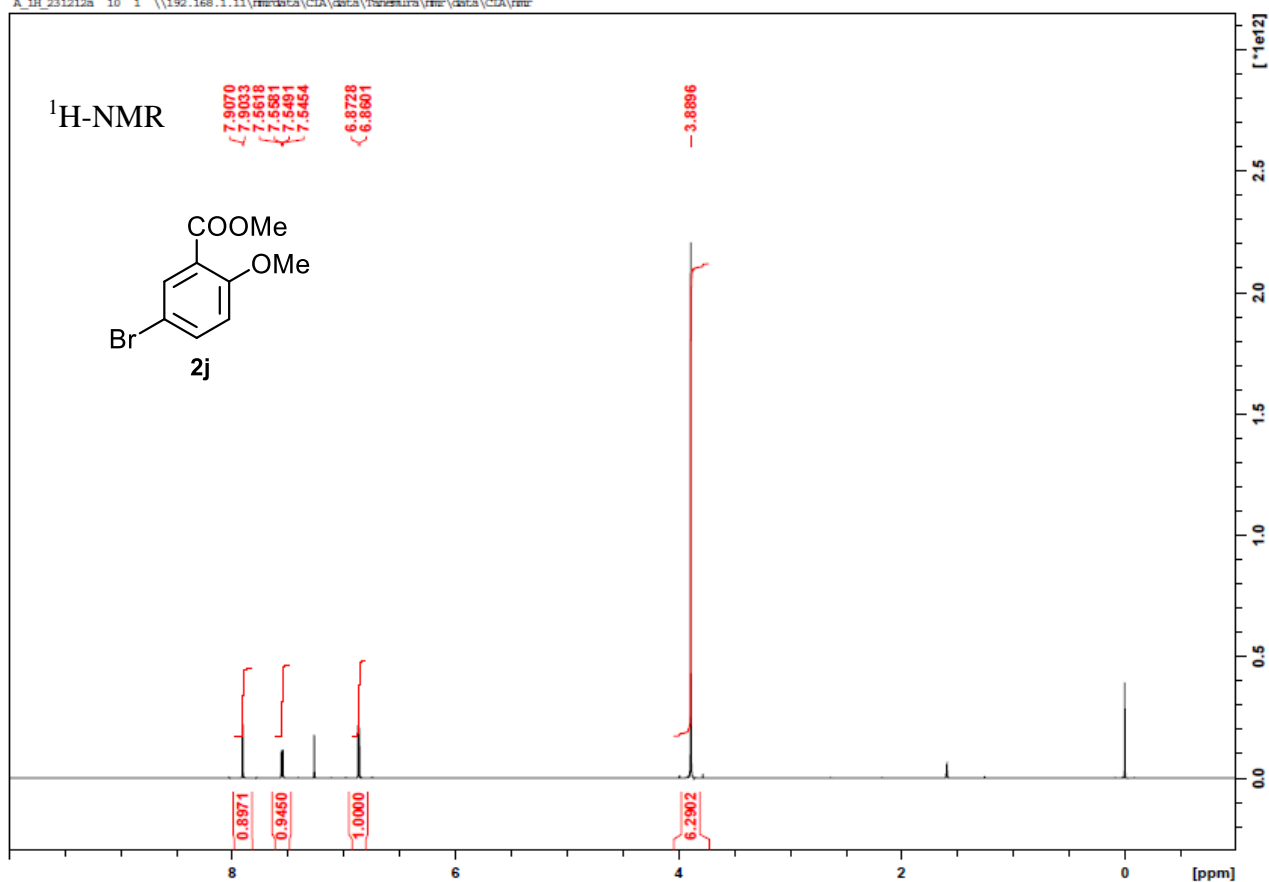

A\_13C\_231212a 12 1 \\192.168.1.11\mrdata\CIA\data\Tanemura\mr\data\CIA\mr

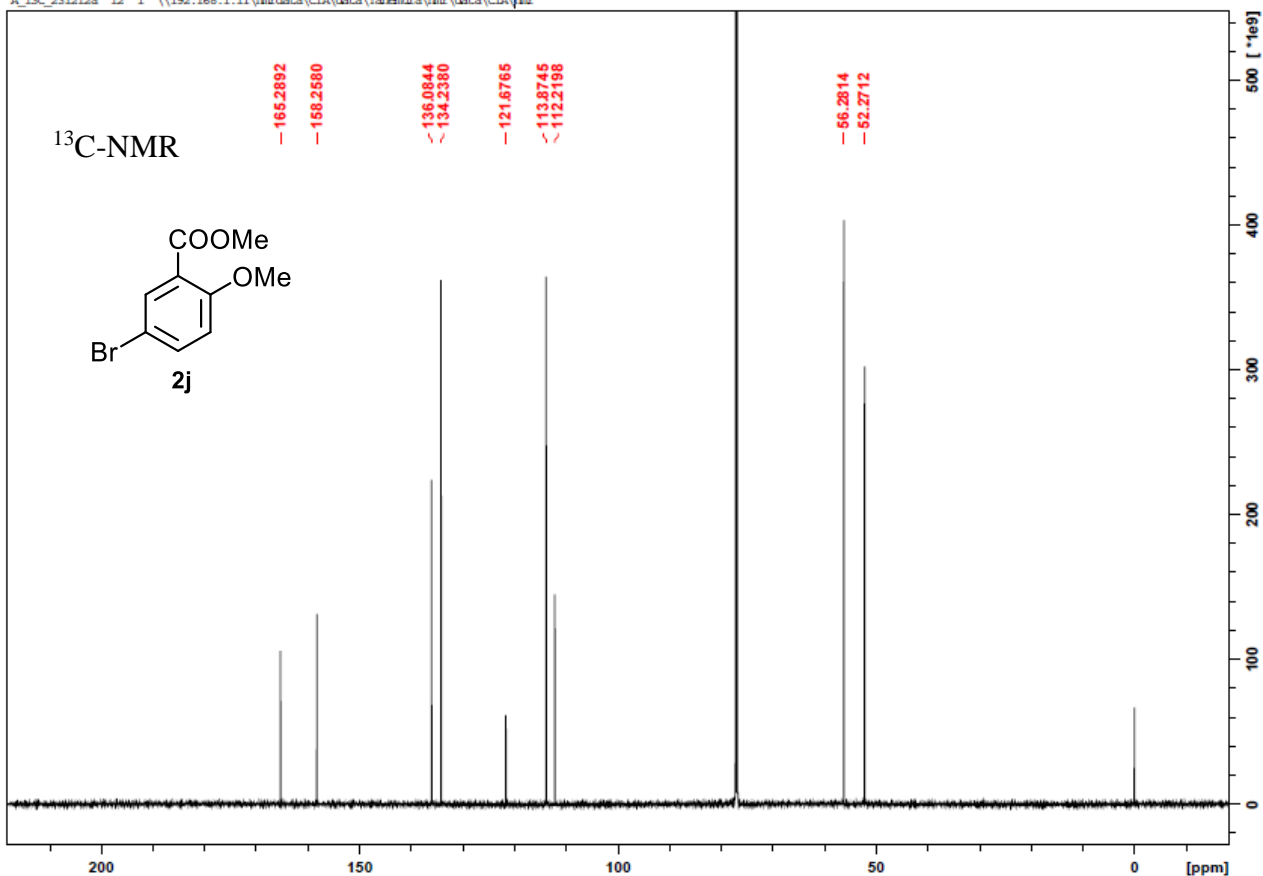

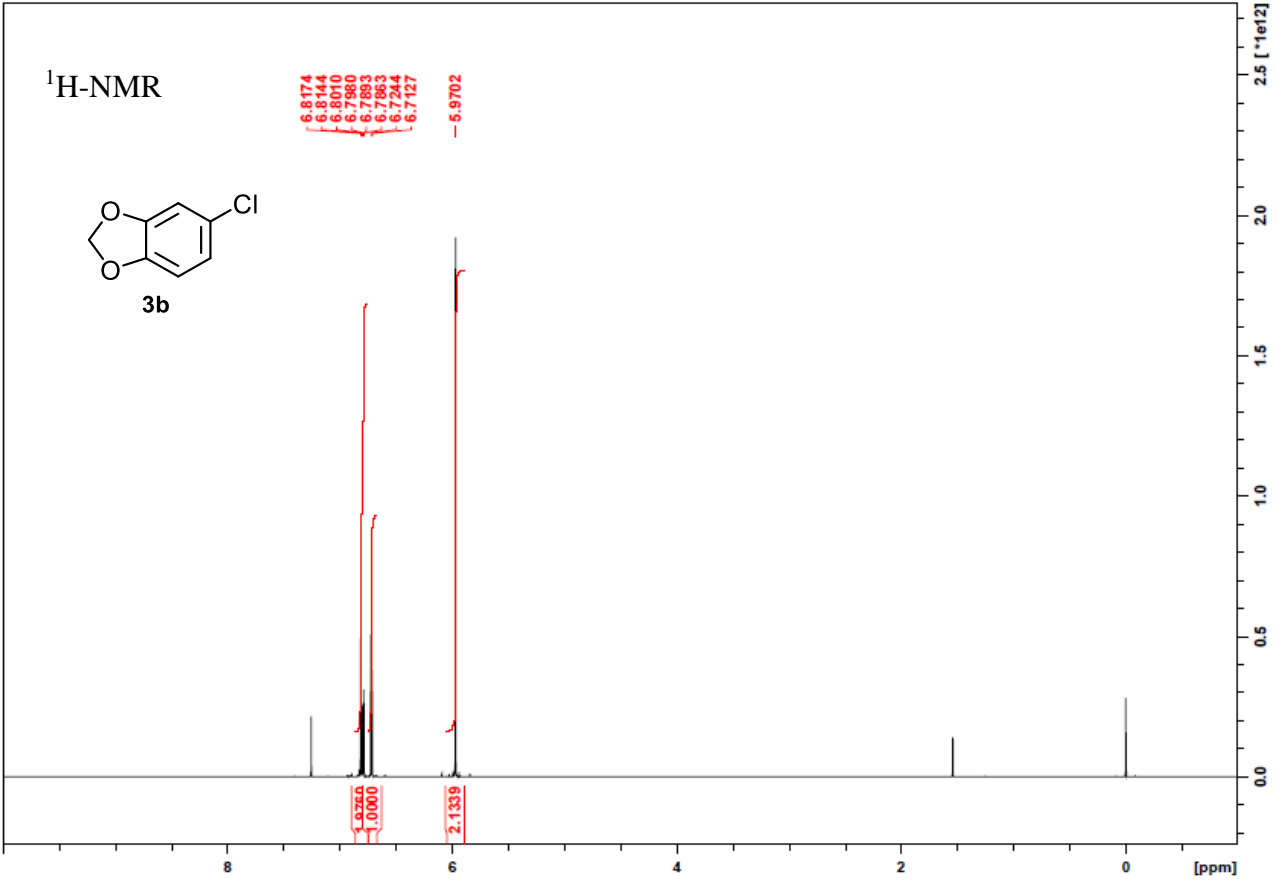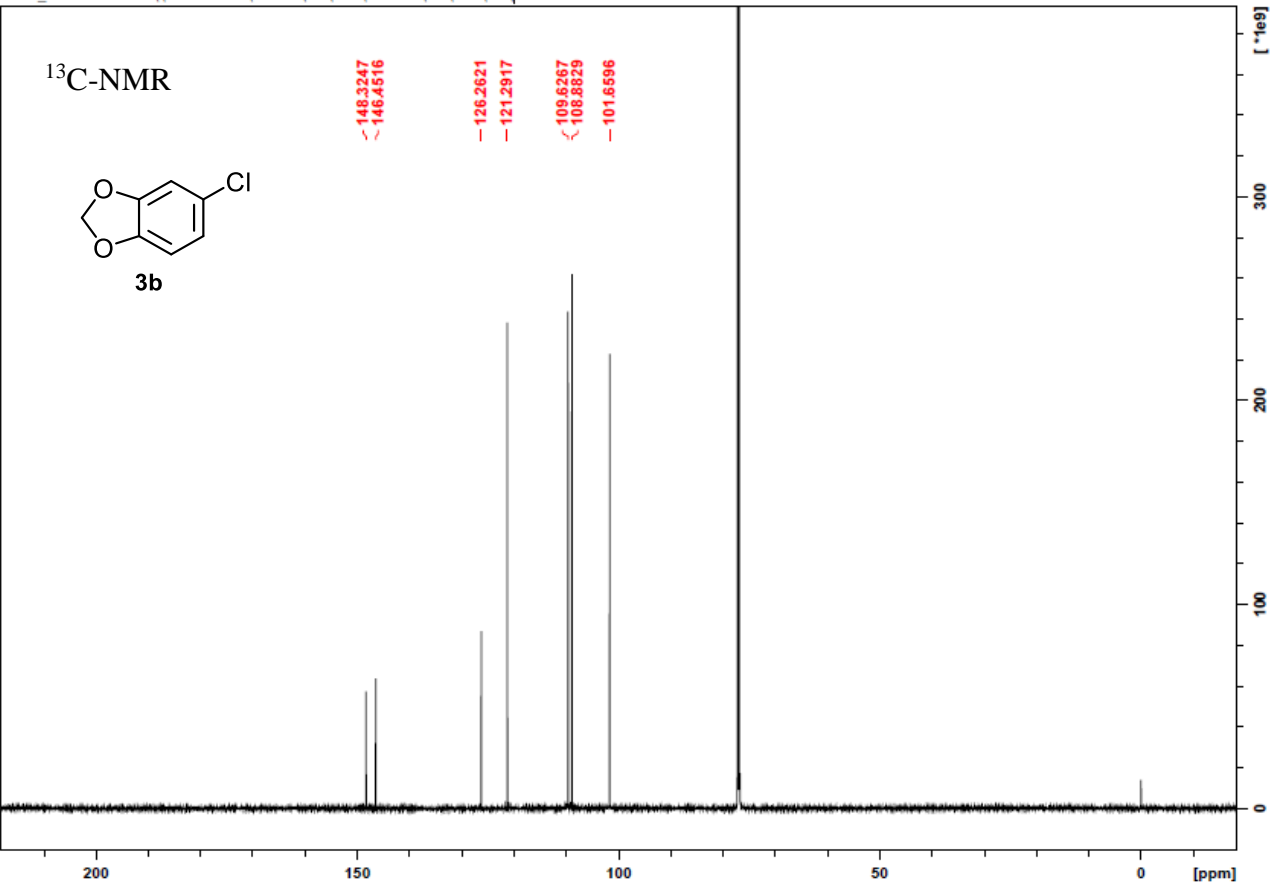

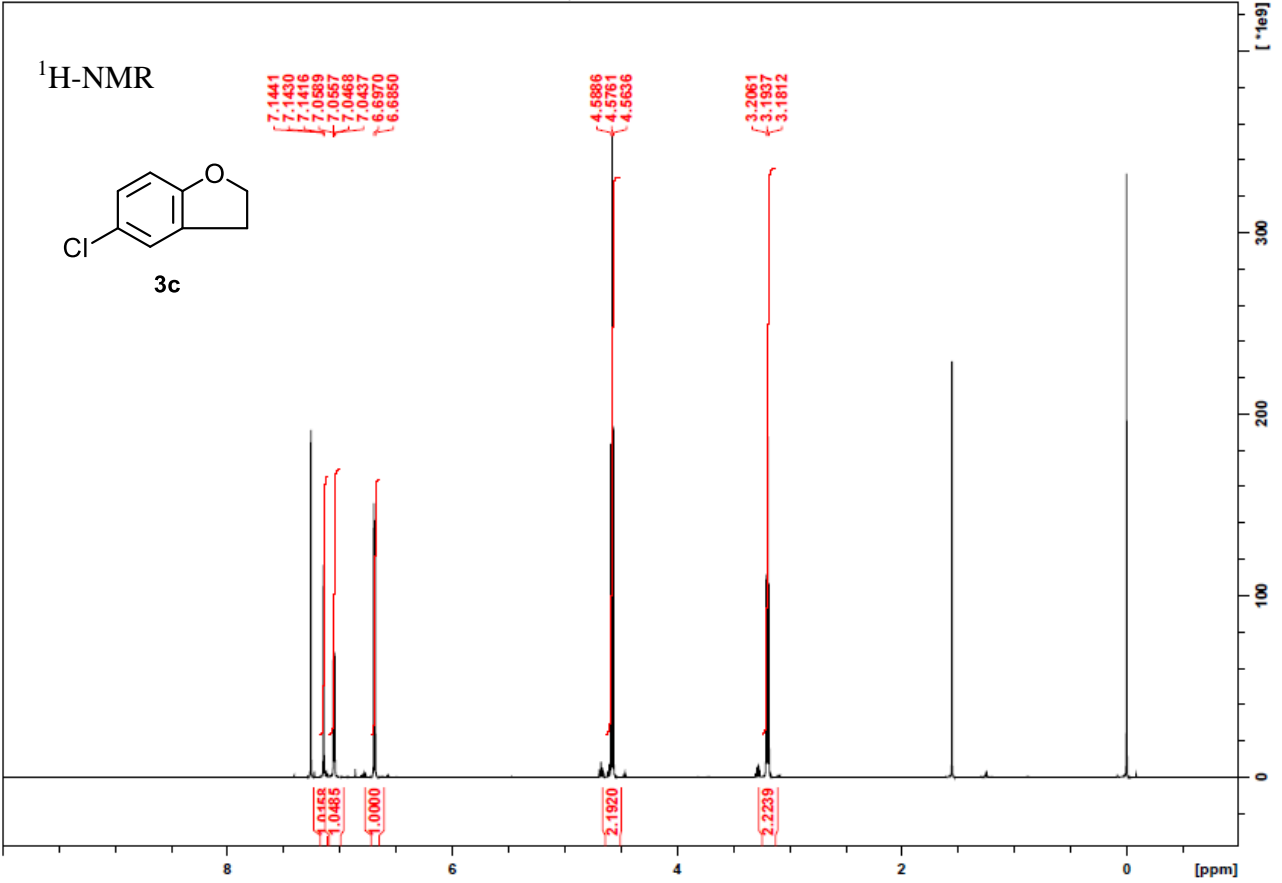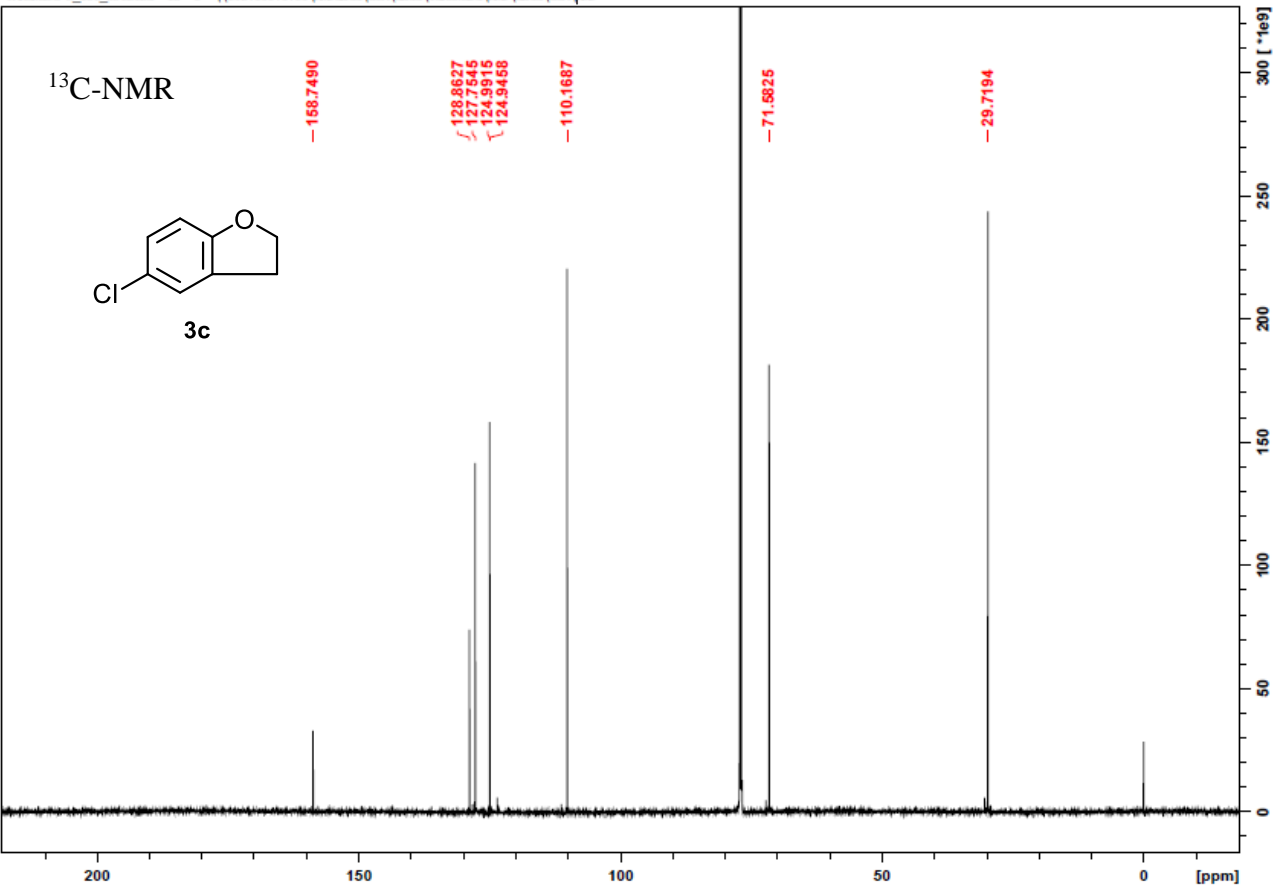



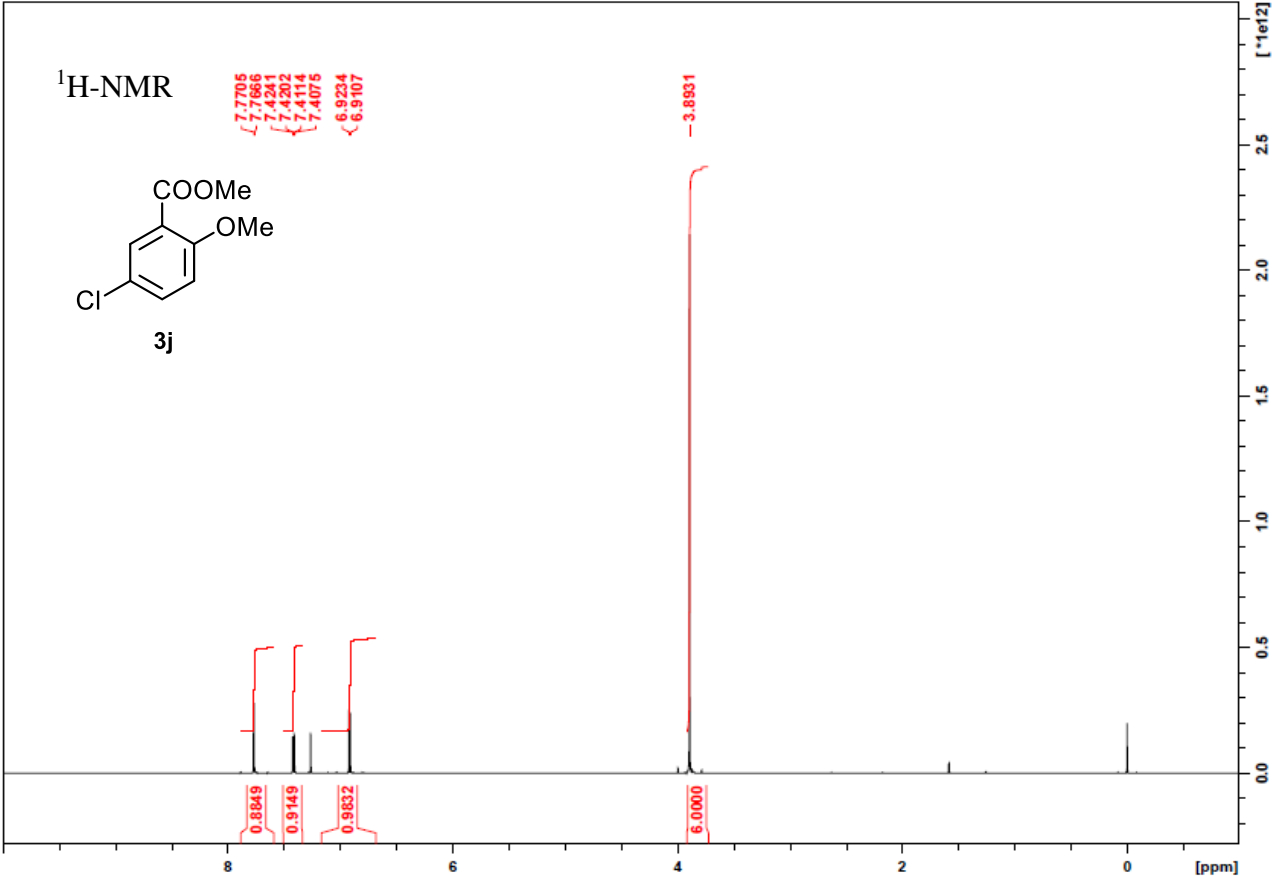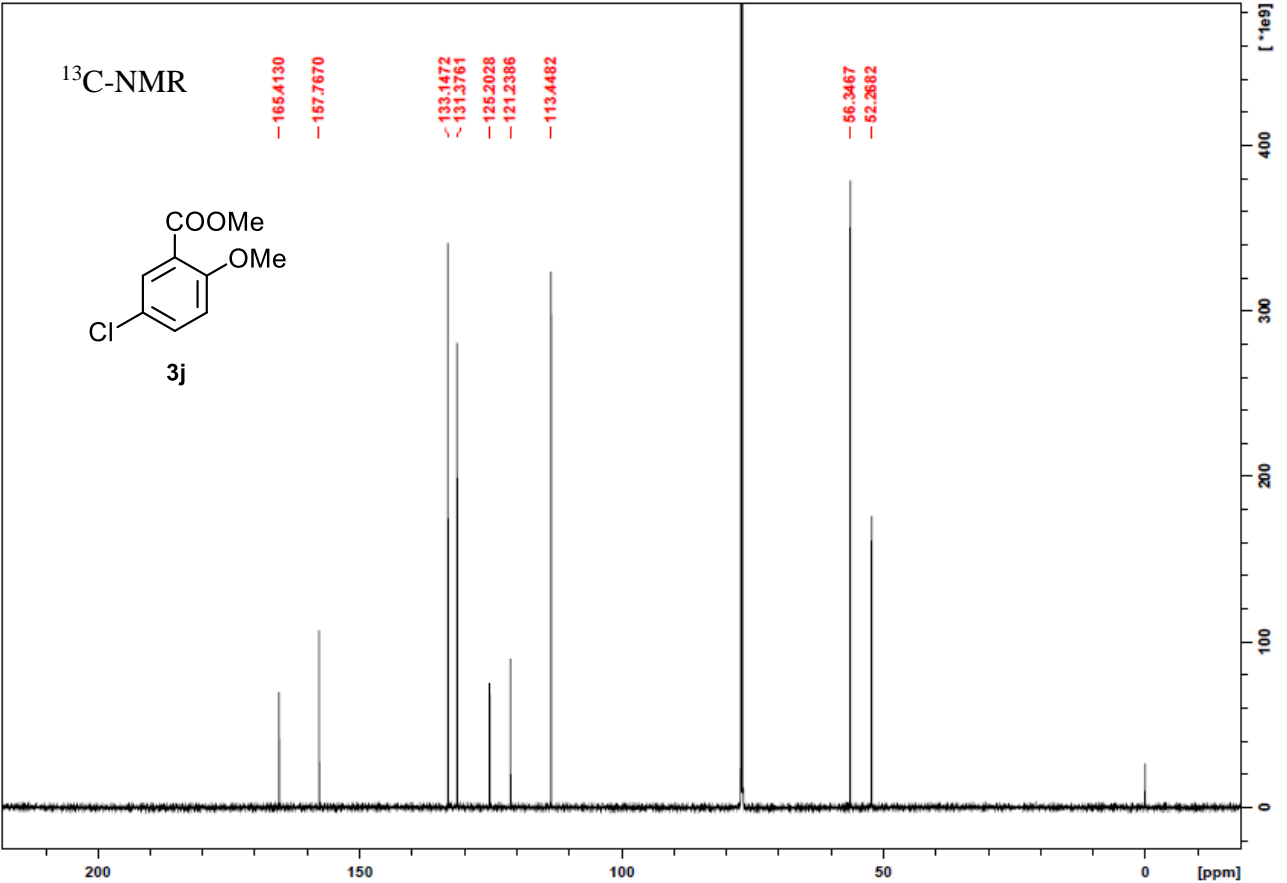

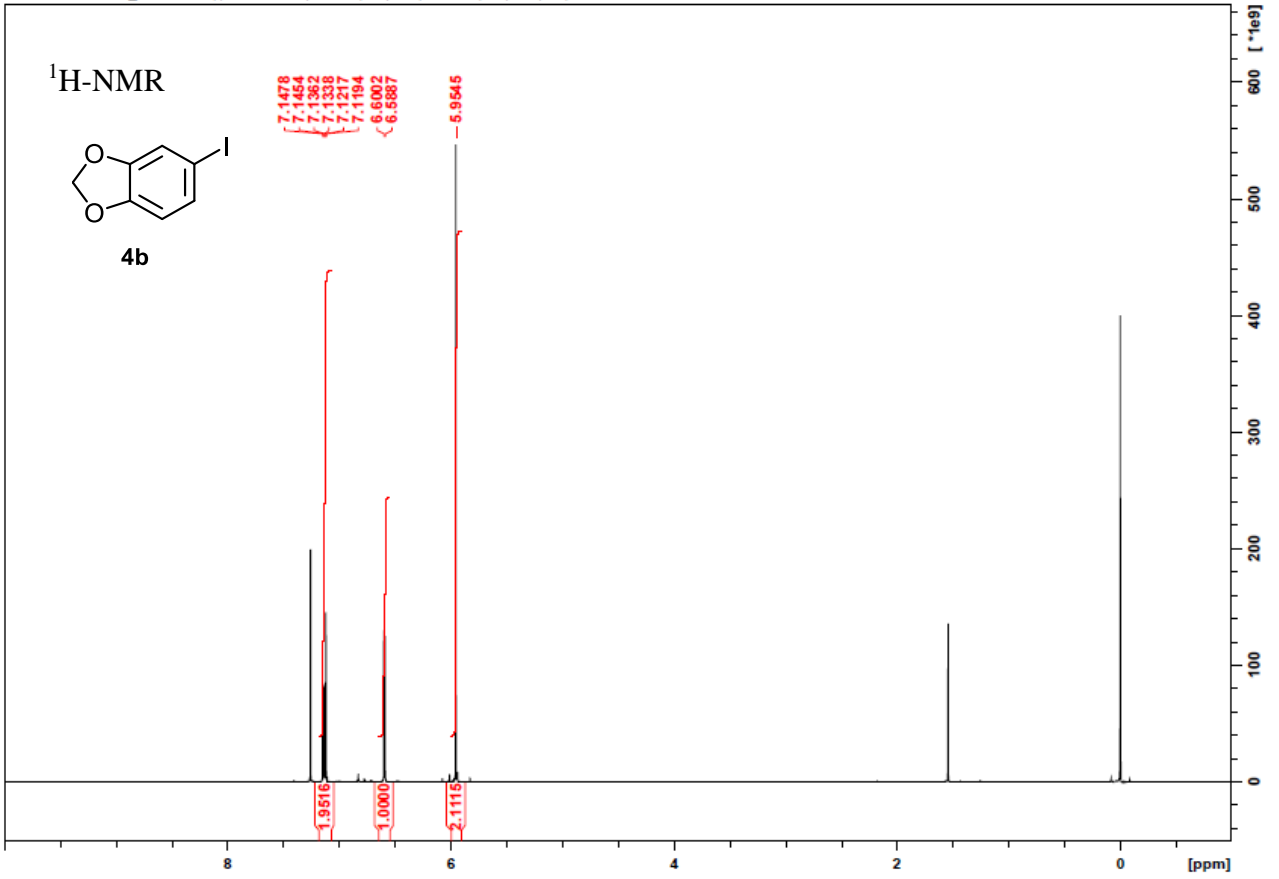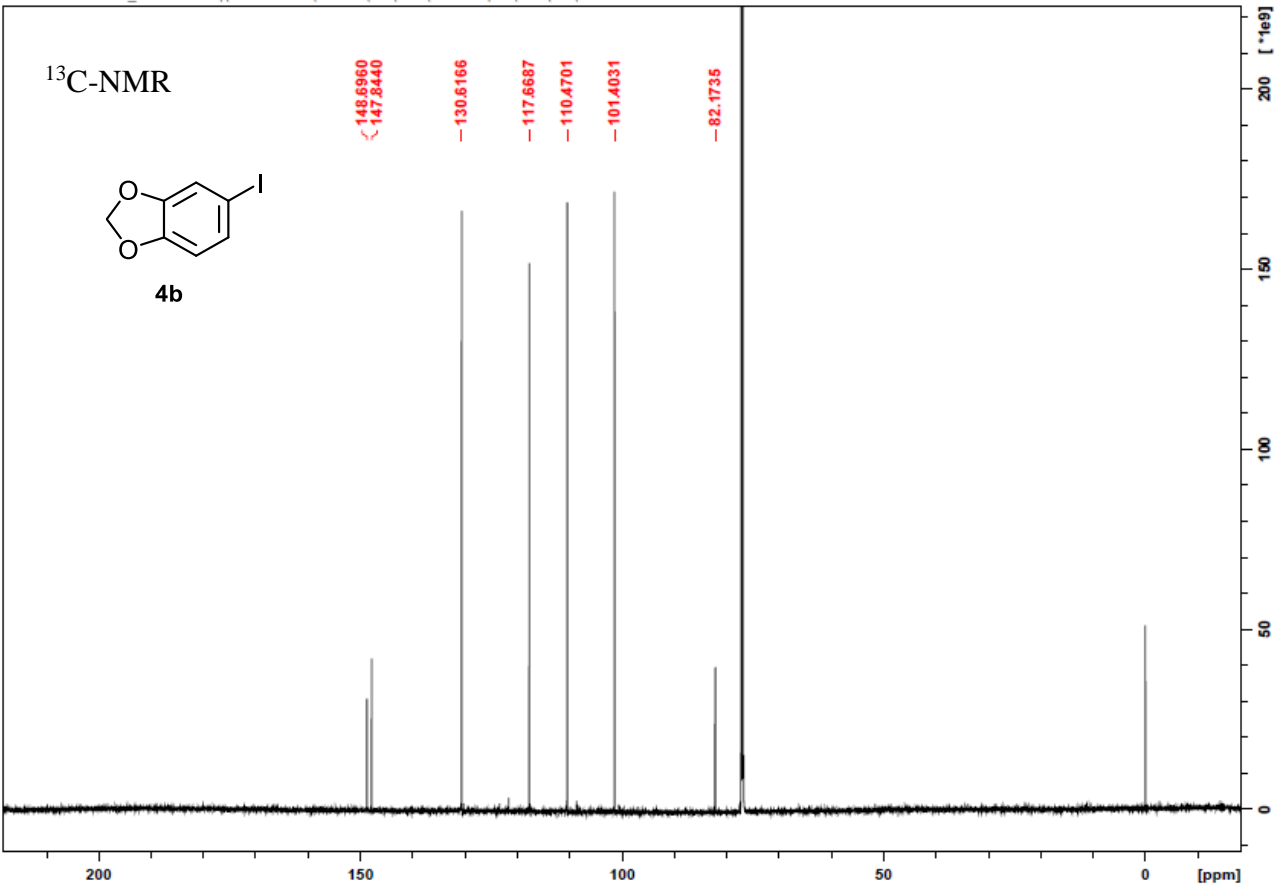

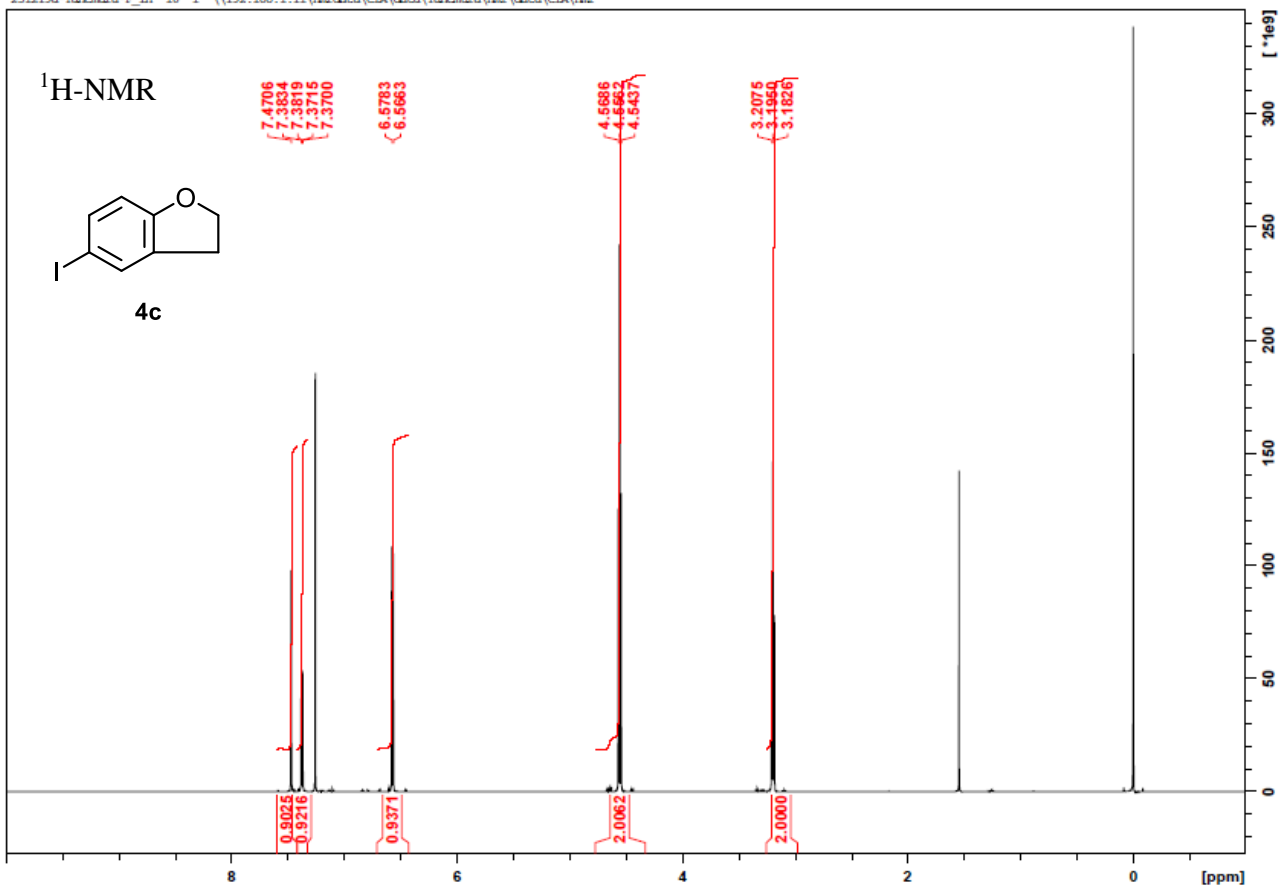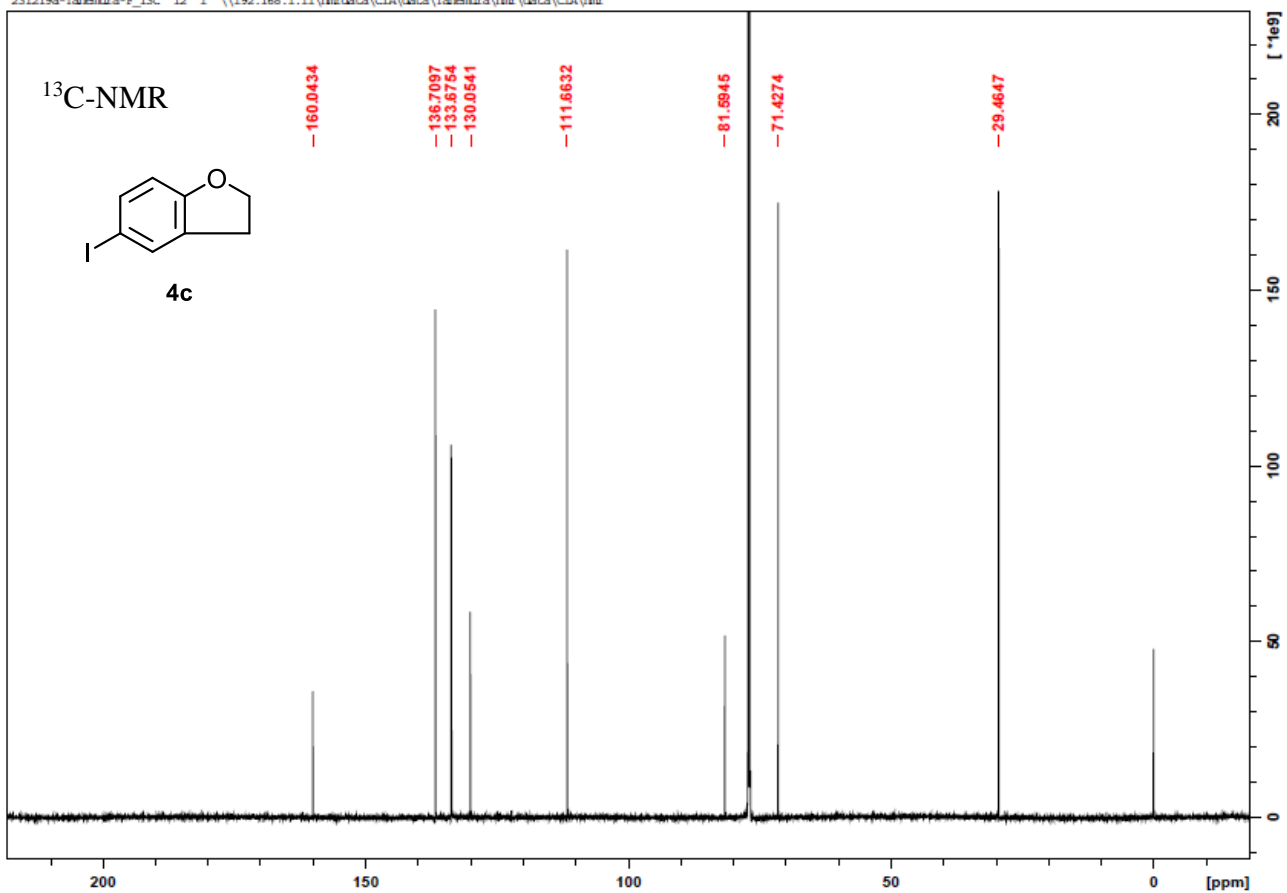

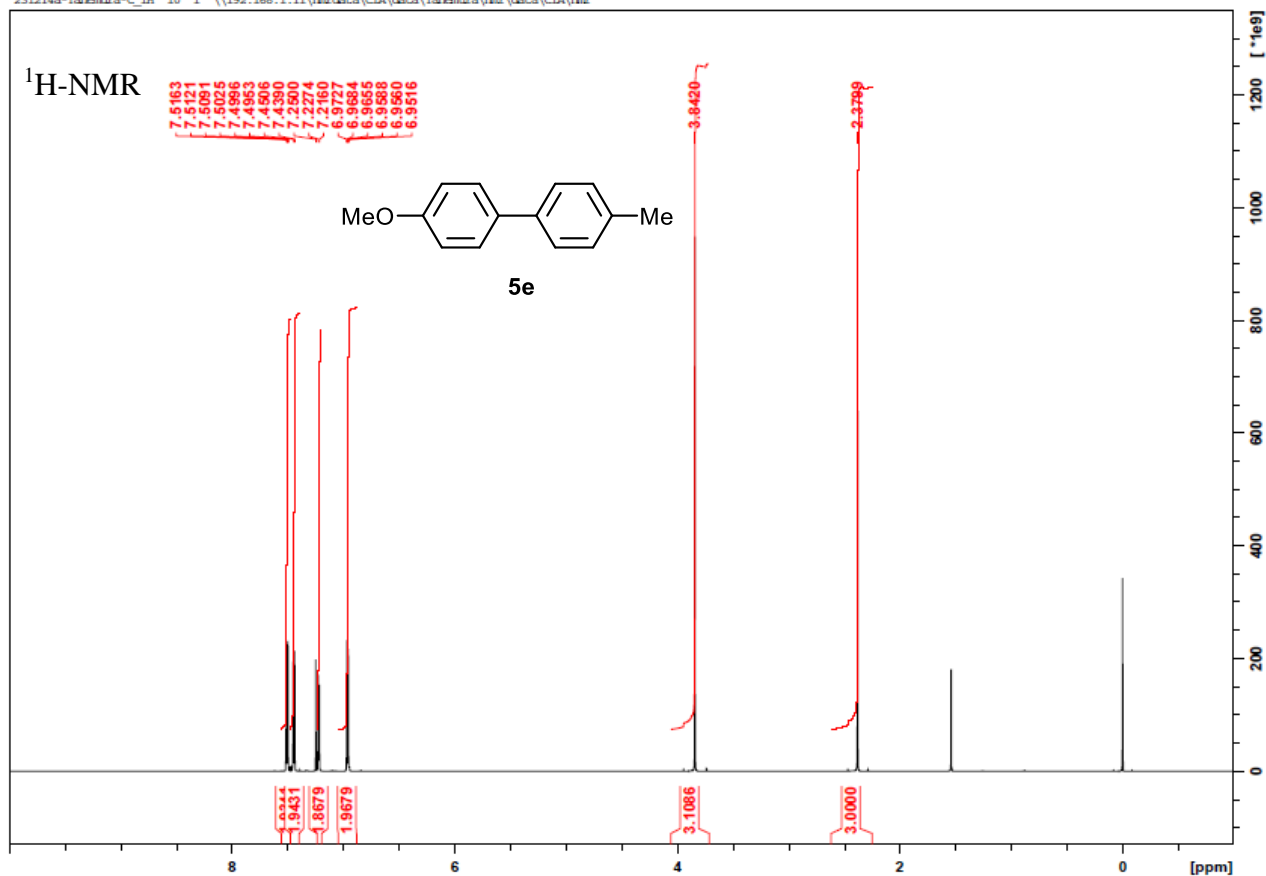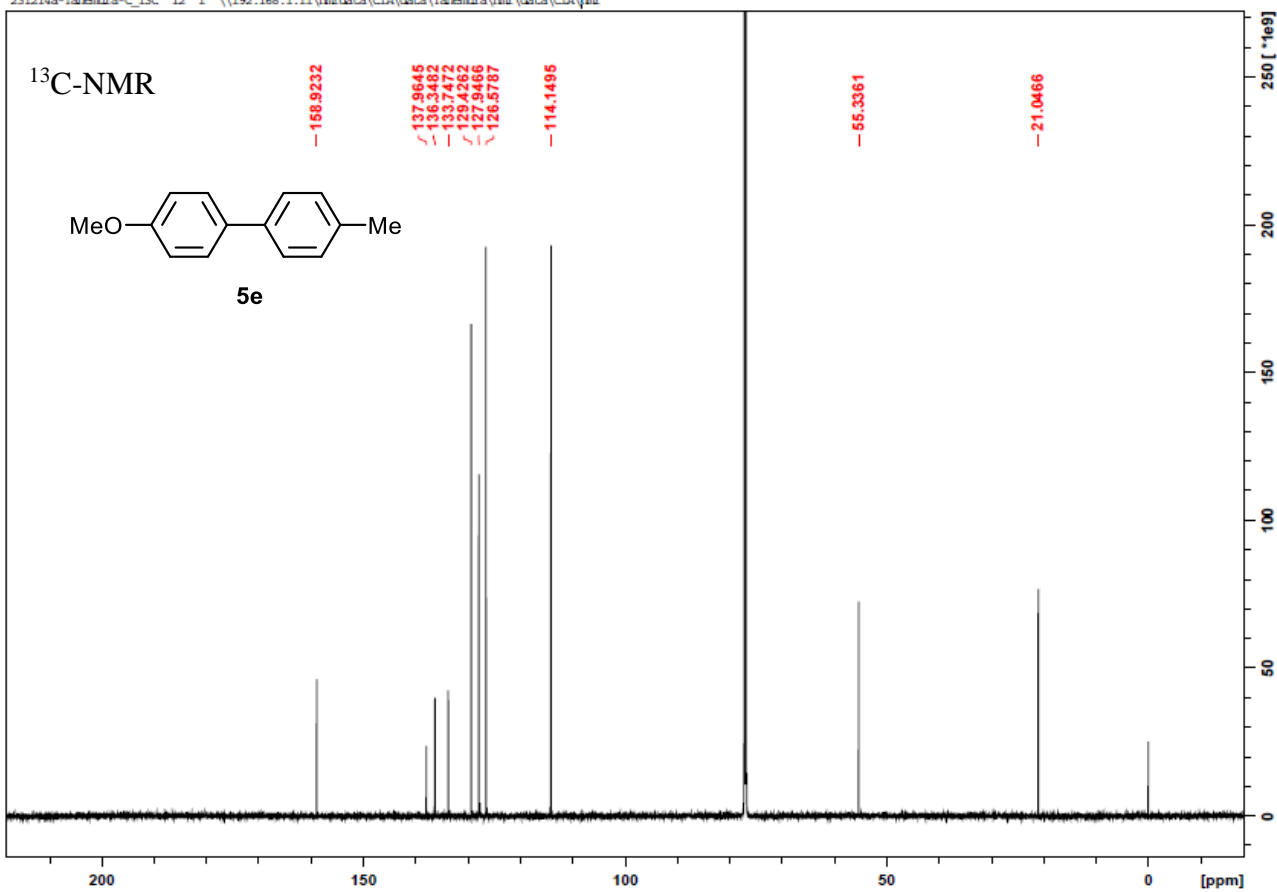

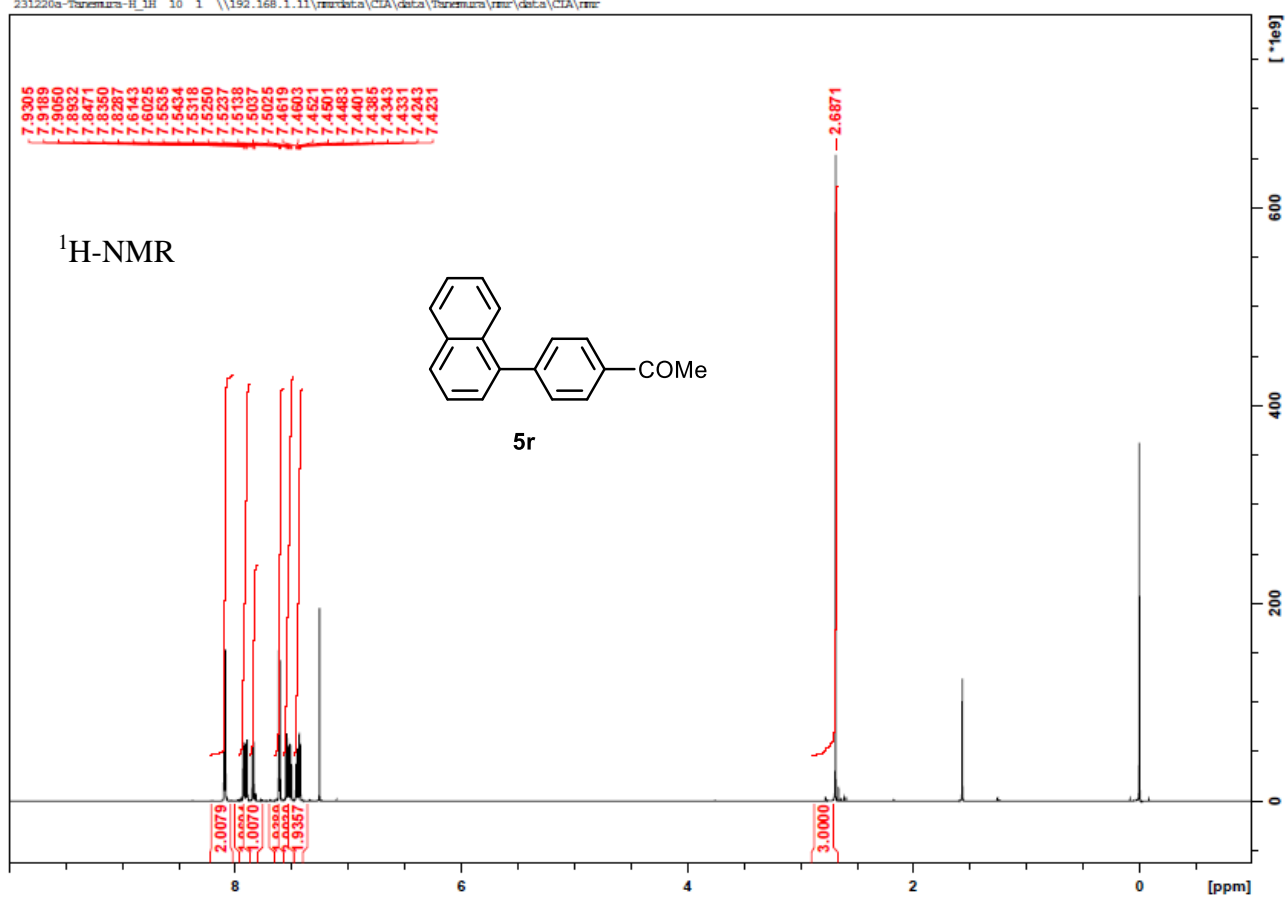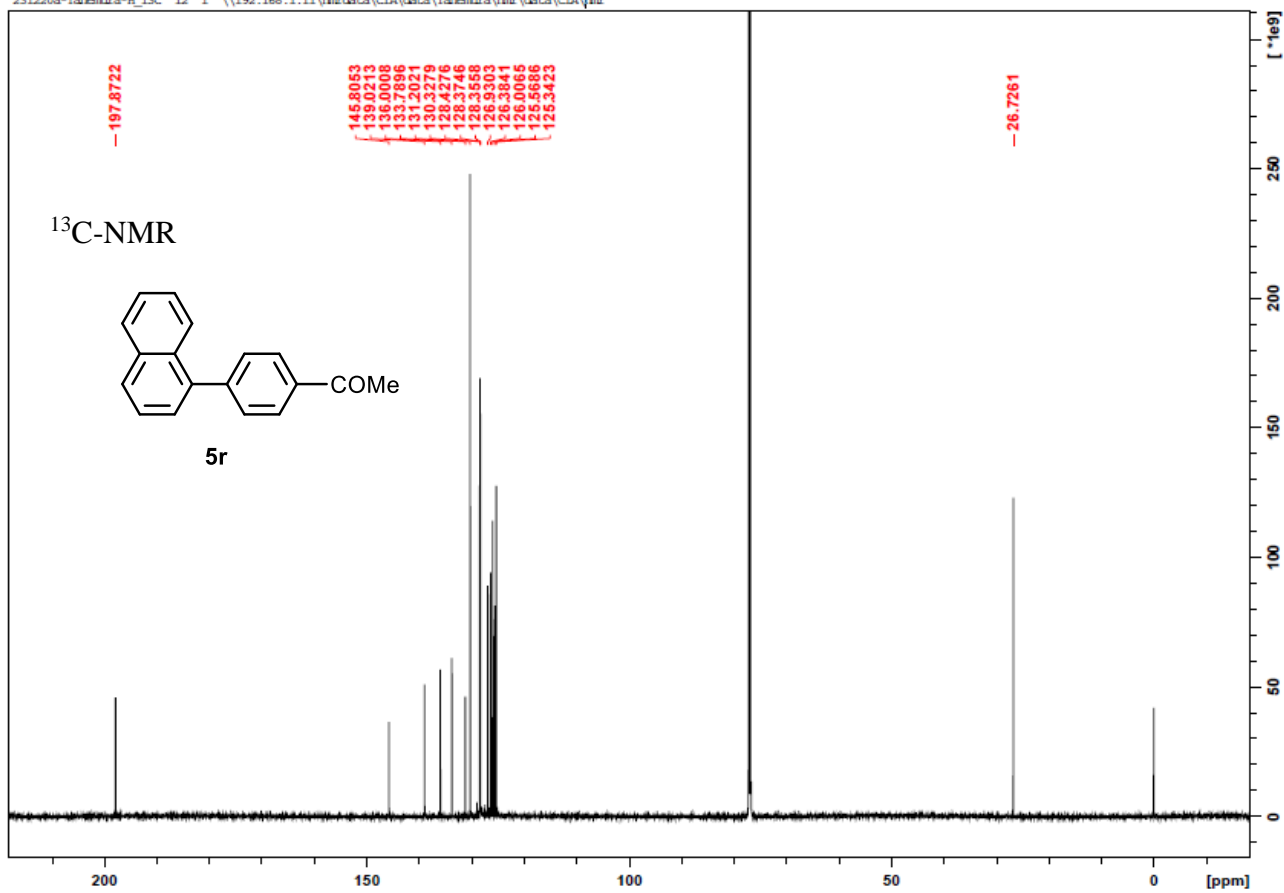

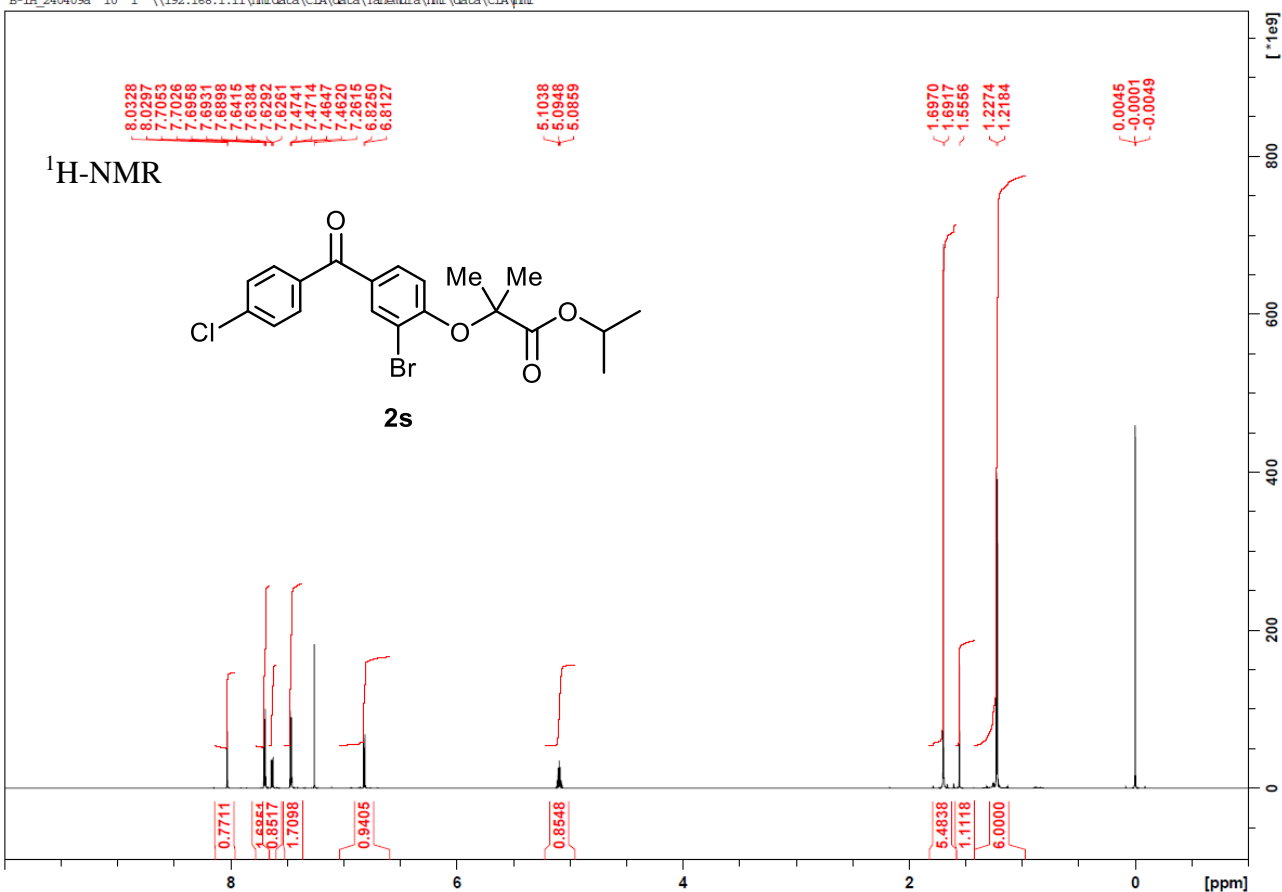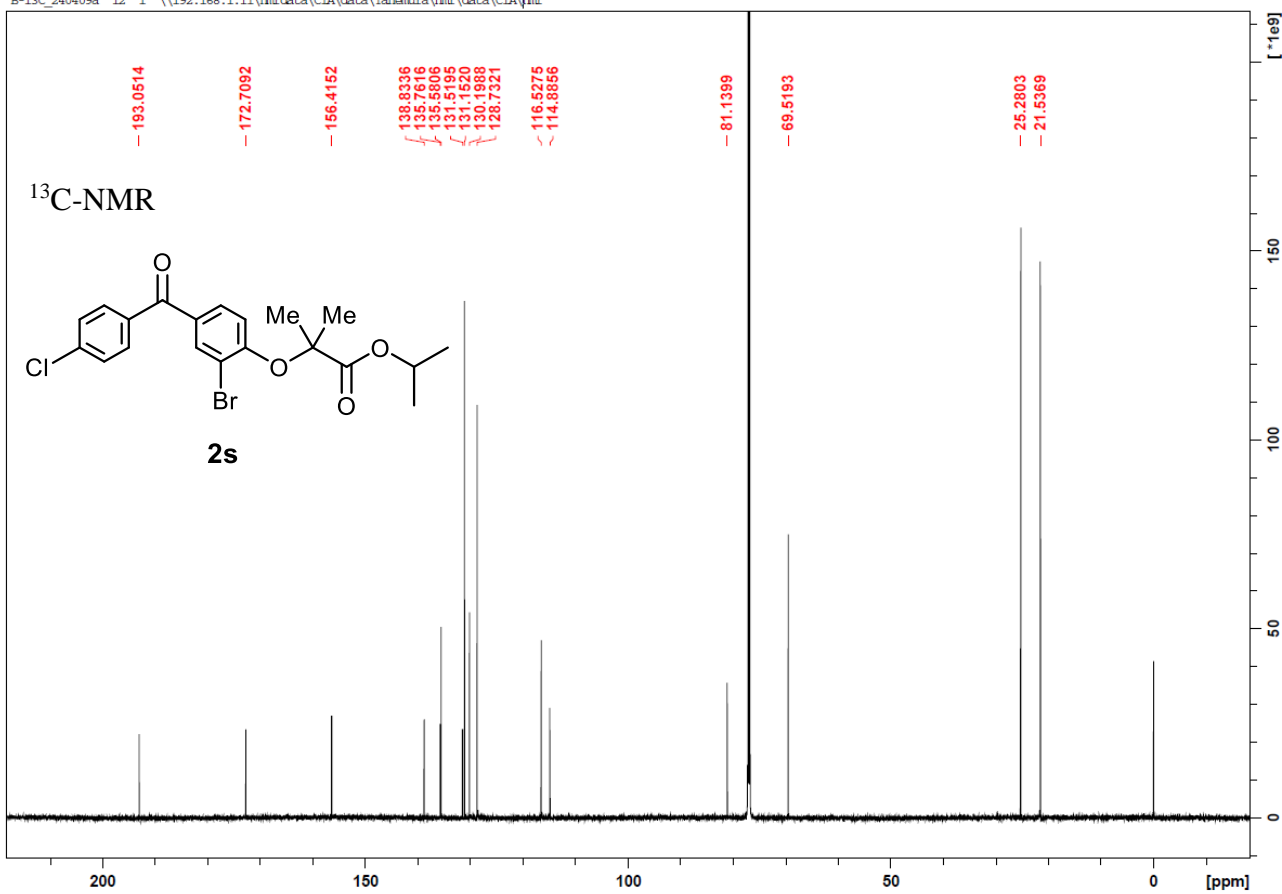

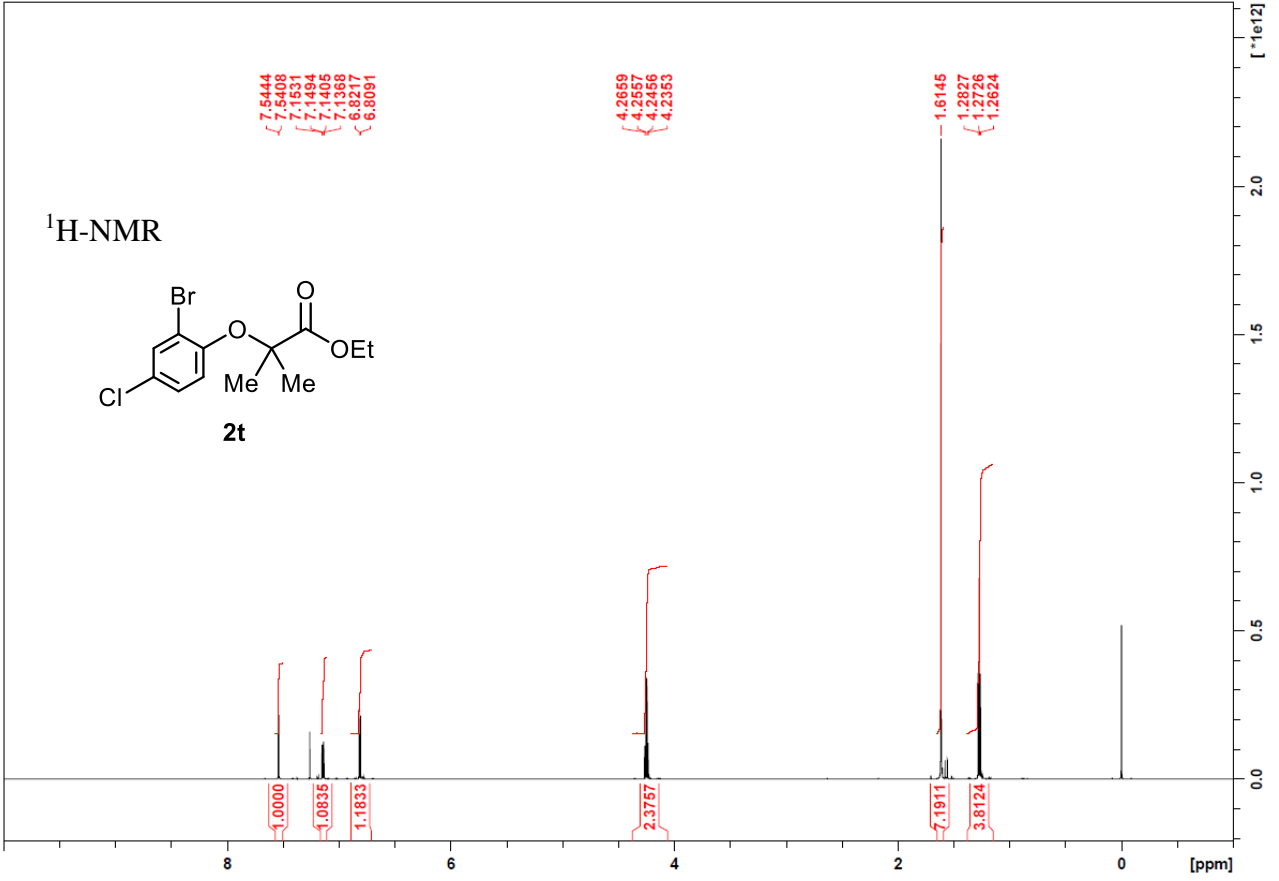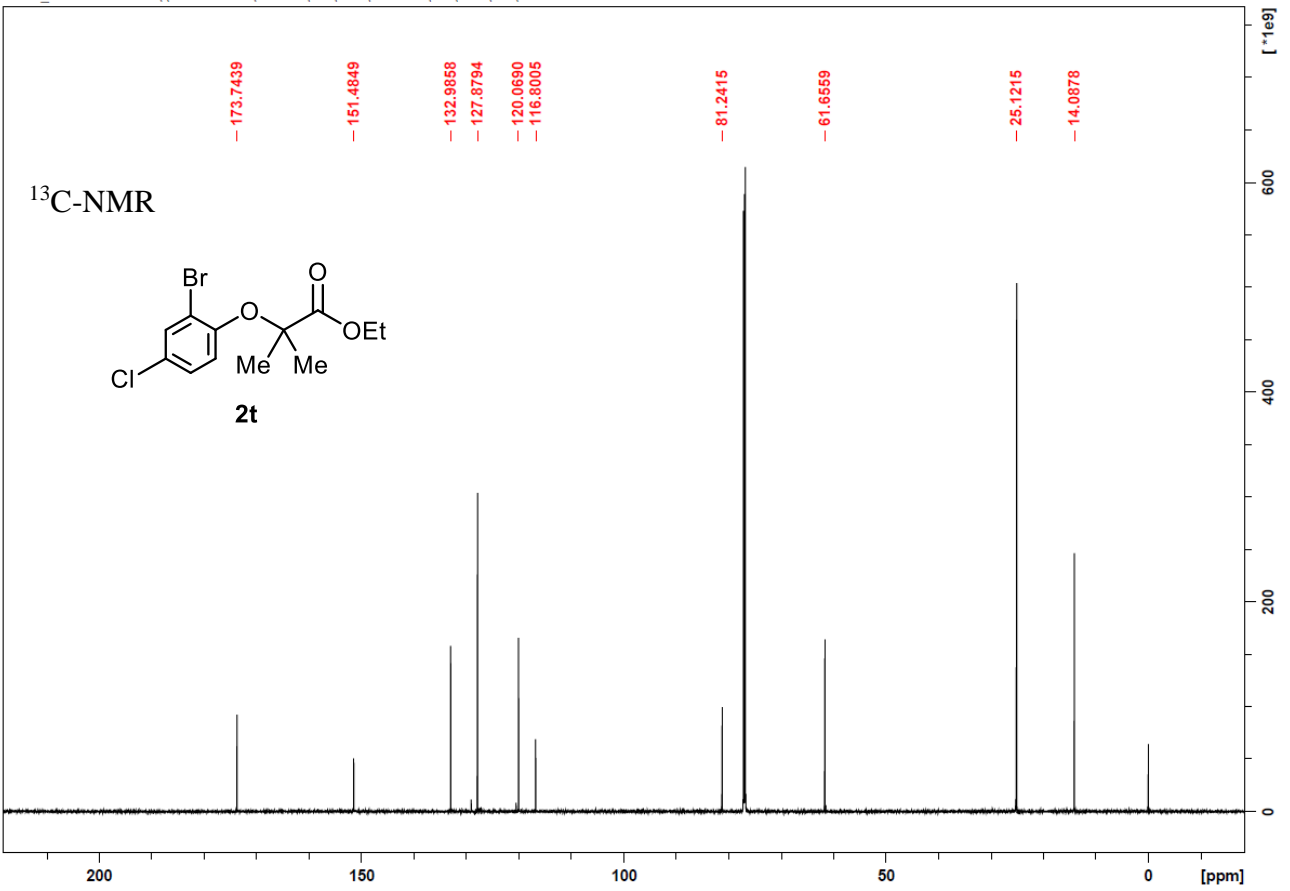

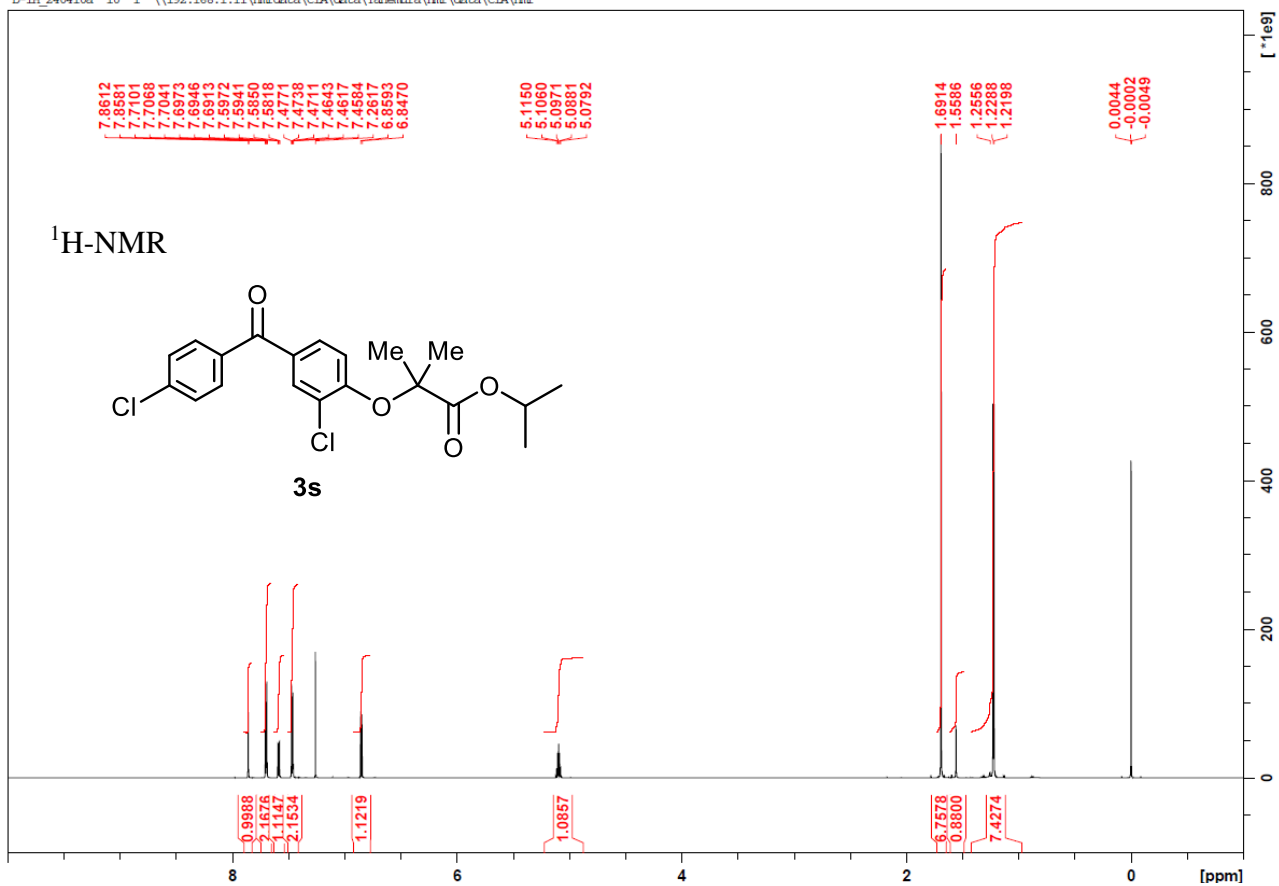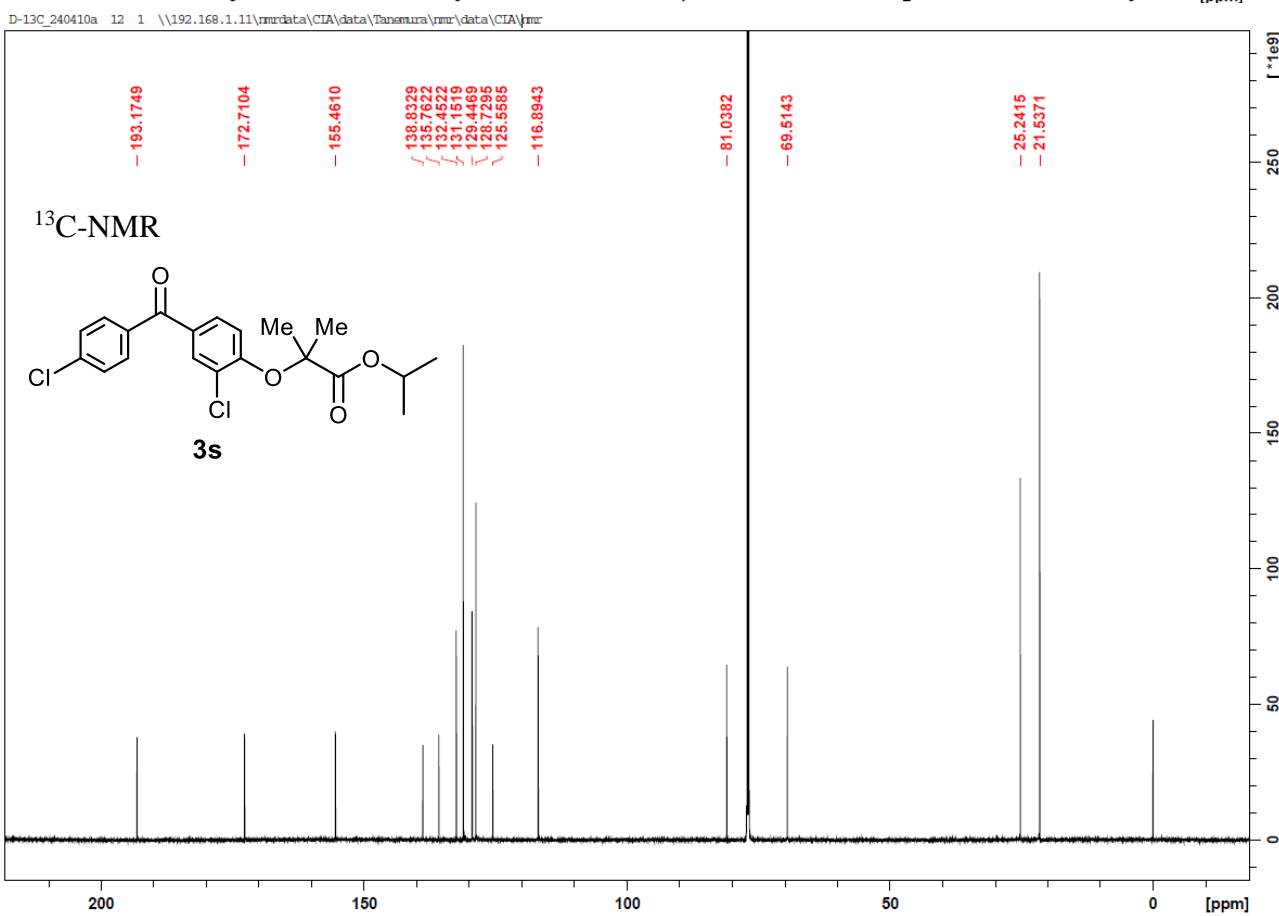



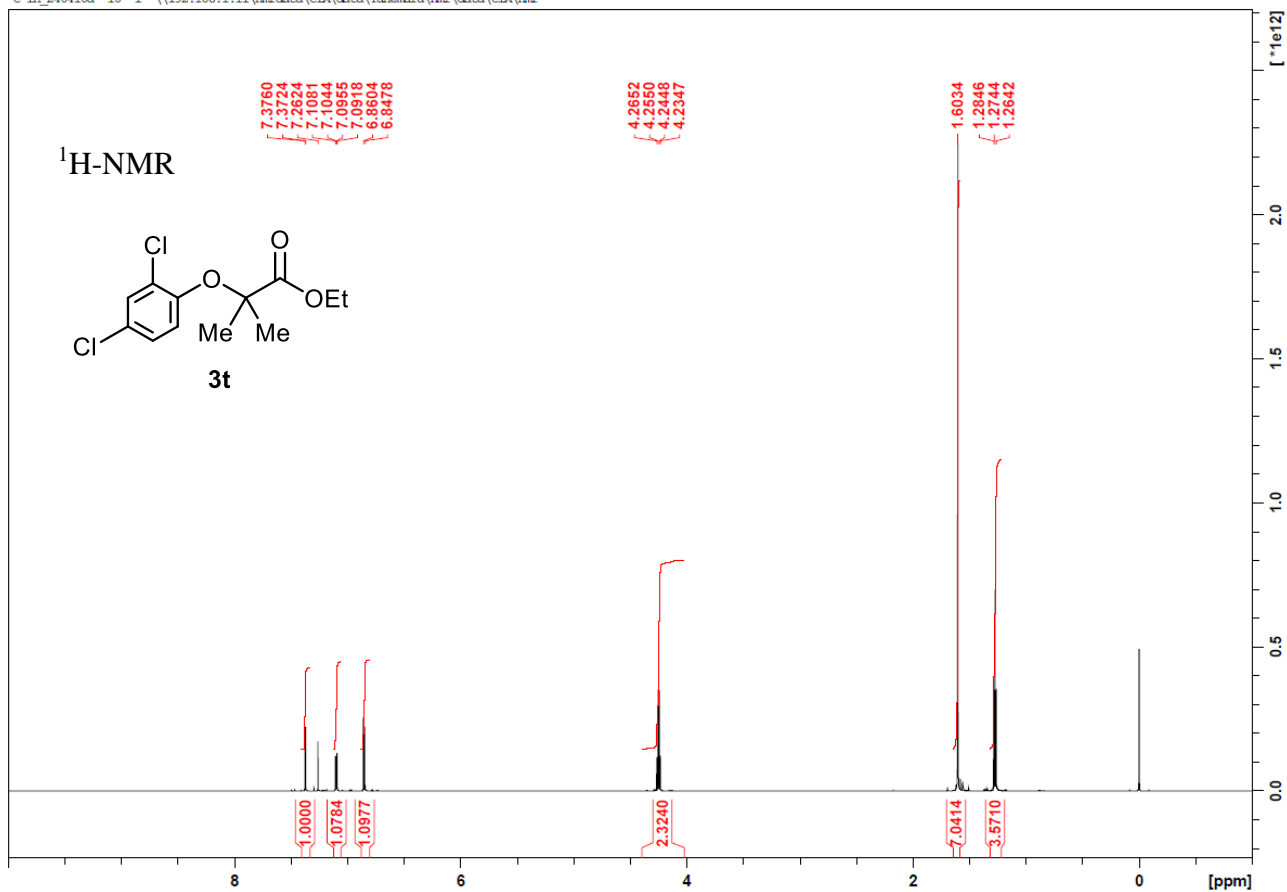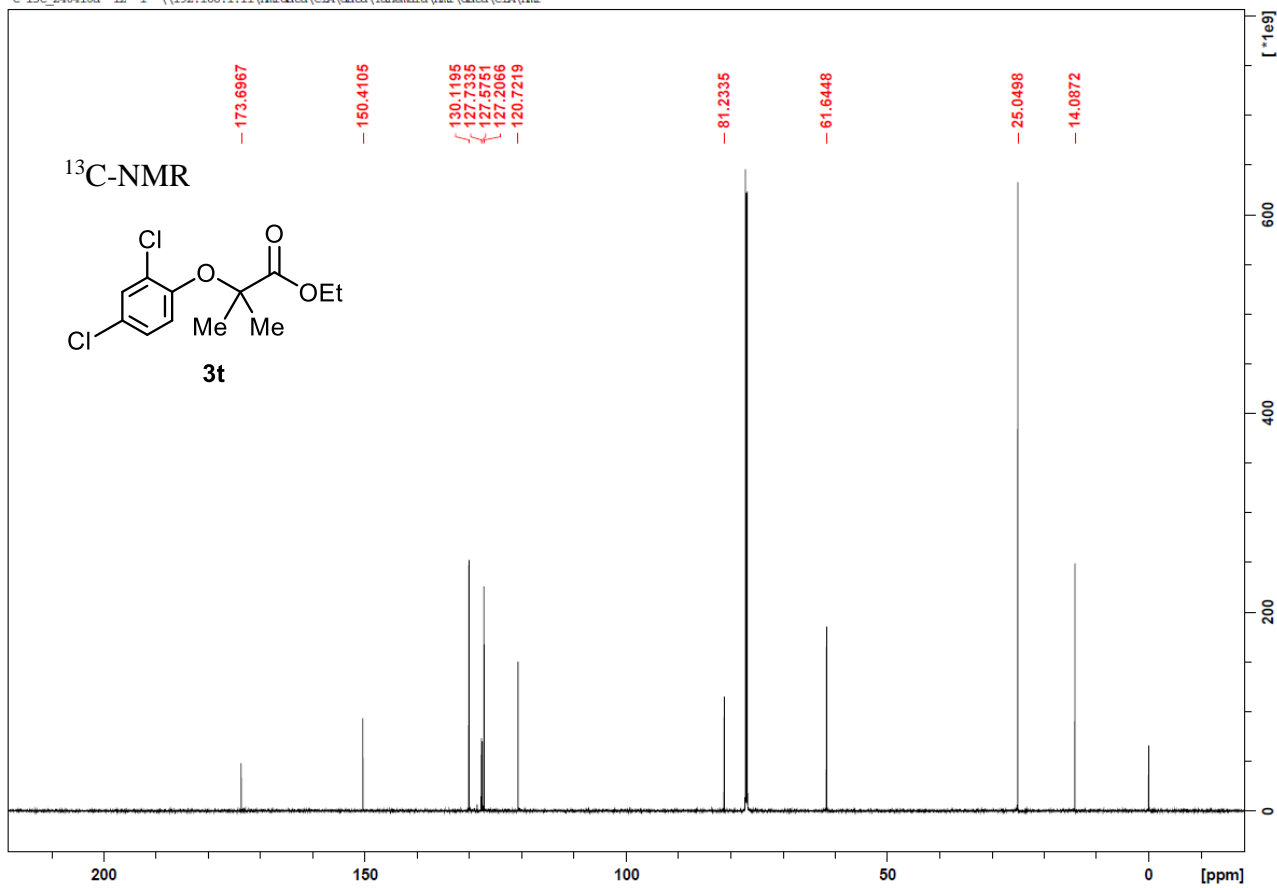

## 7. References

- 1 F. Mo, J. M. Yan, D. Qiu, F. Li, Y. Zhang and J. Wang, *Angew. Chem. Int. Ed.*, 2010, **49**, 2028.
- 2 C. Wu, J. Li, H. Wei, Y. Hang and Y. Jiang, *Acta Crystallogr. Sect. E: Struct. Rep. Online*, 2013, **69**, o1140.
- 3 M. A. Mostafa, R. M. Bowley, D. T. Racys, M. C. Henry and A. Sutherland, *J. Org. Chem.*, 2017, **82**, 7529.
- 4 K. Stêpniak, W. Ferenc, B. Cristóvão and T. Lis, *Eclética Química*, 2007, **32**, 23.
- 5 N. Bosello, A. Di Michele, O. Piccolo and S. Paganelli, *App. Catal. A-Gen.*, 2023, **657**, 119145.
- 6 A. Walser, T. Flynn, C. Mason, H. Crowley, C. Maresca and M. O'Donnell, *J. Med. Chem.*, 1991, **34**, 1440.
- 7 K. Tanemura, *Tetrahedron*, 2023, **140**, 133470.
- 8 X. Li, Y. Liu, L. Zhang, Y. Dong, Q. Liu, D. Zhang, L. Chen, Z. Zhao and H. Liu, *Green Chem.*, 2022, **24**, 6026.
- 9 W. Wang, X. Yang, R. Dai, Z. Yan, J. Wei, X. Dou, X. Qiu, H. Zhang, C. Wang, Y. Liu, S. Song and N. Jiao, *J. Am. Chem. Soc.*, 2022, **144**, 13415.
